# Supplementary material for: Using qualitative and co-design methods to inform the development of an intervention to support and improve physical activity in childhood cancer survivors: a study protocol for BEing Active after ChildhOod caNcer (BEACON)
Source: PubMed Central journal article supplement — BMJ Open. 2020 Dec 21;10(12):e041073. doi: 10.1136/bmjopen-2020-041073 (PMC7754664; doi:10.1136/bmjopen-2020-041073), 2020-12-21
Supplement: bmjopen-2020-041073.draft_revisions.pdf [file bmjopen-2020-041073.draft_revisions.pdf]

# BMJ Open

BMJ Open is committed to open peer review. As part of this commitment we make the peer review history of every article we publish publicly available.

When an article is published we post the peer reviewers' comments and the authors' responses online. We also post the versions of the paper that were used during peer review. These are the versions that the peer review comments apply to.

The versions of the paper that follow are the versions that were submitted during the peer review process. They are not the versions of record or the final published versions. They should not be cited or distributed as the published version of this manuscript.

BMJ Open is an open access journal and the full, final, typeset and author-corrected version of record of the manuscript is available on our site with no access controls, subscription charges or pay-per-view fees (<http://bmjopen.bmj.com>).

If you have any questions on BMJ Open's open peer review process please email [info.bmjopen@bmj.com](mailto:info.bmjopen@bmj.com)

# BMJ Open

## Using qualitative and co-design methods to inform the development of an intervention to support and improve physical activity in childhood cancer survivors: a study protocol for BEing Active after ChildhOod caNcer (BEACON)

|                               |                                                                                                                                                                                                                                                                                                                                                                                                                                                                                                                                                                                                                                                                                                                                                                                                                                                                                                                                                                                                                                      |
|-------------------------------|--------------------------------------------------------------------------------------------------------------------------------------------------------------------------------------------------------------------------------------------------------------------------------------------------------------------------------------------------------------------------------------------------------------------------------------------------------------------------------------------------------------------------------------------------------------------------------------------------------------------------------------------------------------------------------------------------------------------------------------------------------------------------------------------------------------------------------------------------------------------------------------------------------------------------------------------------------------------------------------------------------------------------------------|
| Journal:                      | <i>BMJ Open</i>                                                                                                                                                                                                                                                                                                                                                                                                                                                                                                                                                                                                                                                                                                                                                                                                                                                                                                                                                                                                                      |
| Manuscript ID                 | bmjopen-2020-041073                                                                                                                                                                                                                                                                                                                                                                                                                                                                                                                                                                                                                                                                                                                                                                                                                                                                                                                                                                                                                  |
| Article Type:                 | Protocol                                                                                                                                                                                                                                                                                                                                                                                                                                                                                                                                                                                                                                                                                                                                                                                                                                                                                                                                                                                                                             |
| Date Submitted by the Author: | 04-Jun-2020                                                                                                                                                                                                                                                                                                                                                                                                                                                                                                                                                                                                                                                                                                                                                                                                                                                                                                                                                                                                                          |
| Complete List of Authors:     | <p>Brown, Morven; Newcastle University, Newcastle upon Tyne, Population Health Sciences Institute; Newcastle University Centre for Cancer, Araujo-Soares, Vera; Newcastle University, Population Health Sciences Institute; Newcastle University Centre for Cancer</p> <p>Skinner, Roderick; Newcastle University Centre for Cancer; Great North Children's Hospital, Department of Paediatric and Adolescent Haematology and Oncology</p> <p>Glaser, Adam; University of Leeds, Leeds Institute of Medical Research; Leeds Children's Hospital, Department of Paediatric Oncology</p> <p>Sarwar, Naseem; Leeds Children's Hospital, Department of Paediatric Oncology</p> <p>Saxton, John M ; Northumbria University, Department of Sport, Exercise and Rehabilitation, Faculty of Health and Life Sciences</p> <p>Montague, Kyle; Newcastle University, OpenLab</p> <p>Hall, Jamie</p> <p>Burns, Oliva</p> <p>Sharp, Linda; Newcastle University, Population Health Sciences Institute; Newcastle University Centre for Cancer</p> |
| Keywords:                     | Protocols & guidelines < HEALTH SERVICES ADMINISTRATION & MANAGEMENT, Paediatric oncology < ONCOLOGY, QUALITATIVE RESEARCH                                                                                                                                                                                                                                                                                                                                                                                                                                                                                                                                                                                                                                                                                                                                                                                                                                                                                                           |
|                               |                                                                                                                                                                                                                                                                                                                                                                                                                                                                                                                                                                                                                                                                                                                                                                                                                                                                                                                                                                                                                                      |

SCHOLARONE™  
Manuscripts

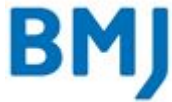

I, the Submitting Author has the right to grant and does grant on behalf of all authors of the Work (as defined in the below author licence), an exclusive licence and/or a non-exclusive licence for contributions from authors who are: i) UK Crown employees; ii) where BMJ has agreed a CC-BY licence shall apply, and/or iii) in accordance with the terms applicable for US Federal Government officers or employees acting as part of their official duties; on a worldwide, perpetual, irrevocable, royalty-free basis to BMJ Publishing Group Ltd ("BMJ") its licensees and where the relevant Journal is co-owned by BMJ to the co-owners of the Journal, to publish the Work in this journal and any other BMJ products and to exploit all rights, as set out in our [licence](#).

The Submitting Author accepts and understands that any supply made under these terms is made by BMJ to the Submitting Author unless you are acting as an employee on behalf of your employer or a postgraduate student of an affiliated institution which is paying any applicable article publishing charge ("APC") for Open Access articles. Where the Submitting Author wishes to make the Work available on an Open Access basis (and intends to pay the relevant APC), the terms of reuse of such Open Access shall be governed by a Creative Commons licence – details of these licences and which [Creative Commons](#) licence will apply to this Work are set out in our licence referred to above.

Other than as permitted in any relevant BMJ Author's Self Archiving Policies, I confirm this Work has not been accepted for publication elsewhere, is not being considered for publication elsewhere and does not duplicate material already published. I confirm all authors consent to publication of this Work and authorise the granting of this licence.

1  
2  
3 **Using qualitative and co-design methods to inform the development of an intervention to support**  
4 **and improve physical activity in childhood cancer survivors: a study protocol for BEing Active after**  
5 **Childhood caNcer (BEACON)**  
6  
7

8  
9 **Morven C Brown<sup>1,2</sup> Vera Araújo-Soares<sup>1,2</sup>, Roderick Skinner<sup>2,3</sup>, Adam W Glaser<sup>4,5</sup>, Naseem Sarwar<sup>4</sup>,**  
10 **John Saxton<sup>6</sup>, Kyle Montague<sup>7</sup>, Jamie Hall<sup>8</sup>, Olivia Burns<sup>8</sup>, Linda Sharp<sup>1,2\*</sup>**  
11  
12

- 13  
14 1. Population Health Sciences Institute, Newcastle University, Newcastle upon Tyne, UK  
15  
16 2. Newcastle University Centre for Cancer, Newcastle University, Newcastle upon Tyne, UK  
17  
18 3. Department of Paediatric and Adolescent Haematology and Oncology, Great North Children's  
19 Hospital, Newcastle upon Tyne Hospitals NHS Trust, Newcastle upon Tyne, UK  
20  
21 4. Department of Paediatric Oncology, Leeds Children's Hospital, Leeds Teaching Hospitals NHS  
22 Trust, Leeds, UK  
23  
24 5. Leeds Institute of Medical Research, University of Leeds, Leeds, UK  
25  
26 6. Department of Sport, Exercise and Rehabilitation, Faculty of Health and Life Sciences,  
27 Northumbria University, Newcastle upon Tyne, UK  
28  
29 7. OpenLab, Newcastle University, Newcastle upon Tyne, UK  
30  
31 8. Patient and public representatives for the study  
32

33 \*Corresponding author: Linda Sharp, Population Health Sciences Institute, Newcastle University, Sir  
34 James Spence Institute, Royal Victoria Infirmary, Queen Victoria Road, NE1 4LP. Email:  
35 linda.sharp@ncl.ac.uk. Tel: +44 191 208 6275  
36  
37  
38

39 **Morven Brown:** morven.brown@ncl.ac.uk

40  
41 **Vera Araújo-Soares:** vera.araujo-soares@ncl.ac.uk

42  
43 **Roderick Skinner:** roderick.skinner@ncl.ac.uk

44  
45 **Adam Glaser:** a.glaser@nhs.net

46  
47 **Naseem Sarwar:** n.sarwar@nhs.net

48  
49 **John Saxton:** john.saxton@northumbria.ac.uk

50  
51 **Kyle Montague:** kyle.montague@ncl.ac.uk

52  
53 **Jamie Hall:** jamie.hall@hotmail.com

54  
55 **Olivia Burns:** oliviaburns96@outlook.com

56  
57 **Linda Sharp:** linda.sharp@ncl.ac.uk

58 **Keywords:** child; cancer survivors; exercise; health behaviour; behavioural sciences

59  
60 **Word count:** 3893

## ABSTRACT

### Introduction:

Childhood cancer survivors (CCSs) treated with cardiotoxic cancer treatments are at increased risk of developing cardiometabolic complications. This risk is further exacerbated by poor health behaviours. In particular, CCSs are less active than non-cancer comparators. Existing interventions aiming to improve physical activity (PA) levels in CCSs are methodologically weak. The aim of this study is to rigorously and systematically develop an evidence- and theory-based intervention to promote, support, improve and sustain PA levels in CCSs, with the long-term goal of reducing CCSs' cardiovascular morbidity and mortality.

### Methods and analysis:

The Being Active after Childhood Cancer (BEACON) study involves two workpackages at two NHS sites in England, UK. *Participants:* CCSs and their parents, and healthcare professionals (HCPs) involved in their care. *Methods:* Workpackage one (WP1) will use qualitative methods to explore and understand the barriers and facilitators to PA in CCSs. Two sets of semi-structured interviews will be conducted with (i) CCSs (aged 10 -24 years) and (ii) parents of CCSs. Workpackage two (WP2) will use co-design methods to bring together stakeholders (CCSs; their parents; HCPs; researchers) to develop a prototype intervention. Where possible, all data will be audio-recorded and transcribed. *Analysis:* Data from WP1 will be analysed using a thematic approach. Analysis of WP2 data will involve content analysis, and analysis of formative output and procedures.

### Ethics and dissemination:

The study was approved by North East - Tyne & Wear South Research Ethics Committee (REC ref: 18/NE/0274). Research findings will be disseminated primarily via national and international conferences and publication in peer-reviewed journals. Patient and public involvement (PPI) will inform further dissemination activities.

## ARTICLE SUMMARY

### Strengths and limitations of this study

- The BEACON study will provide in-depth knowledge on the barriers and facilitators to PA in CCSs.
- The use of recognised frameworks of intervention development and principles from behavioural science to systematically develop an evidence- and theory-based health behaviour change intervention is a significant strength.
- Intervention development will actively engage stakeholders (CCSs, parents and healthcare professionals), ensuring that the resulting intervention is co-produced with those it aims to support, and maximizing likely acceptability and feasibility.
- The prototype intervention developed will be ready to be taken forward into production and testing.

## INTRODUCTION

As a result of treatment advances, the population of childhood cancer survivors (CCSs) has rapidly grown. In the UK alone, there are more than 40,000 CCSs,<sup>1</sup> whilst across Europe there may be up to 500,000.<sup>2</sup> Two-thirds of CCSs may develop chronic health conditions by 15-25 years post-diagnosis.<sup>3</sup> In particular, those treated with cardiotoxic therapies can experience persistent and cumulative damage to their cardiovascular, pulmonary and metabolic systems.<sup>4</sup> Cardiovascular complications are a leading cause of morbidity among CCSs, and British CCSs have a 3.4-fold excess risk of cardiac death.<sup>5</sup> Development of these chronic conditions impacts adversely not only on the survivors' physical health, but also on their psychological health and wellbeing and incurs costs for the healthcare system.

In the general population, it is well recognised that poor cardiovascular outcomes are strongly related to modifiable health behaviours, including a lack of physical activity (PA).<sup>6</sup> Similarly, low levels of PA in even young CCSs (<18 years), have been linked to a worse cardiovascular risk profile,<sup>7</sup> and CCSs are often less active than controls without a history of cancer.<sup>8</sup> However, amongst long-term survivors of childhood lymphoma, a higher levels of vigorous PA is associated with a 50% lower risk of any cardiovascular event.<sup>9</sup> Moreover, a Cochrane review indicated that physical exercise training programmes may improve physical fitness, body composition and cardiorespiratory fitness in childhood cancer patients and survivors.<sup>10</sup> Considered together, this evidence provides a strong rationale for developing effective interventions to increase PA in CCSs.

Reviews have concluded that interventions to increase PA levels among CCSs are feasible and safe. However, studies are heterogeneous and most are methodologically limited.<sup>11,12</sup> In addition, there is little evidence that interventions have been systematically developed using recognised frameworks of intervention development.<sup>13</sup> Critically, while an understanding of factors which may promote or inhibit the target health behaviour (here, PA) is an essential first step in intervention design,<sup>14-17</sup> most interventions appear to have been developed without having undertaken formative work to gain this understanding. Indeed, currently, little is known about determinants of PA behaviours in CCSs. Additionally, although the application of appropriate theory is recognised in behavioural science as an essential element of behaviour change interventions,<sup>14-17</sup> most interventions appear to have no robust theoretical underpinnings.

Leading authorities advocate active stakeholder involvement in the design and development of novel health interventions,<sup>14-17</sup>; this is essential to understanding the perspectives and psychosocial context of users.<sup>18</sup> However, most interventions for CCSs have been developed without the involvement of CCSs, raising concerns about the relevance and acceptability of the interventions to survivors. Moreover, although parents are key agents in their children's PA behaviour,<sup>19,20</sup> there has been little attempt to understand either: (i) how the beliefs of parents of CCSs might influence their child's PA behaviours, or (ii) how parental support may be harnessed to encourage PA in CCSs.

A further consideration is wider implementation of interventions among CCSs. Those developed thus far were not designed to be deliverable within the context of the UK National Health Service (NHS). More generally, there is a lack of research exploring how support to modify health behaviours (including PA) among CCSs can be implemented effectively and feasibly in follow-up care. Involvement of HCPs and other relevant stakeholders in the development process would increase the likelihood that an intervention will be feasible, acceptable and implementable in the current healthcare pathway for CCSs; this does not appear to have been widely done.

1  
2  
3 This project seeks to comprehensively investigate barriers and enablers to PA among CCSs – from  
4 the CCS, parental and wider stakeholder perspective. Using the knowledge gained, and with the  
5 support of key stakeholders, we will develop a person-centred evidence- and theory-based  
6 prototype intervention aimed at promoting and supporting sustainable PA behaviour change in  
7 CCSs.  
8  
9

## 10 11 12 **AIMS AND OBJECTIVES**

### 13 14 **Aim**

15 The ultimate goal of the BEACON project is to develop an intervention which can reduce  
16 cardiometabolic risk markers in the medium-term, and reduce cardiovascular morbidity and  
17 mortality in the long-term, whilst also helping to prevent a deterioration in patient well-being and  
18 health-related quality of life due to poor cardiovascular health.  
19  
20

### 21 22 **Objectives**

23 The objectives of this phase of the BEACON project are to:

- 24 1) explore CCSs' experiences of, and participation in, PA behaviours.
- 25 2) identify and explore the barriers and enablers of PA behaviours in CCSs.
- 26 27 3) explore CCSs' and parents' experiences of receiving advice on PA or exercise, and perceived  
28 need for this information.
- 29 30 4) actively engage key stakeholders (CCSs, their parents, HCPs) in a co-design process to  
31 develop a prototype intervention.  
32  
33  
34  
35  
36

## 37 38 **METHODS AND ANALYSIS**

### 39 40 **Study design**

41 The study will be informed by intervention development approaches - notably the Medical Research  
42 Council framework of intervention development<sup>15</sup> and the Person-Based Approach<sup>18</sup> to ensure that  
43 the resulting intervention is systematically developed from the bottom-up and: 1) is theory- and  
44 evidence-based;<sup>14 15 17 21-23</sup> 2) prioritises and incorporates the views of the people who will use the  
45 intervention;<sup>18 24</sup> and 3) is likely to be implementable and scalable in the NHS.<sup>25 26</sup> The current phase  
46 of the project is focused on the intervention development. The planned research activities (which  
47 form two sequential workpackages), and the other formative work previously undertaken by the  
48 study team which will feed into intervention development, are summarized in Table 1 and Figure 1.  
49 Workpackage 1 (WP1) will generate evidence on determinants of PA among CCSs. Workpackage 2  
50 (WP2) will involve a co-design process to produce a prototype intervention.  
51  
52  
53  
54  
55  
56  
57  
58  
59  
60

## Participants

WP1 involves CCSs and parents/guardians of CCSs; eligibility criteria are shown in Table 2. Participants will be recruited via two clinical sites which are both specialist centres in childhood cancer treatment.

WP2 will recruit CCSs, parents/guardians of CCSs and HCPs. The same inclusion and exclusion criteria as for WP1 will apply for CCSs and parents/guardians. HCPs will be eligible if they are involved in the follow-up care of CCSs. Academics and researchers with relevant expertise will also be eligible.

## Sampling

### WP1: Generating evidence on determinants of PA among CCSs

Potential participants will be selected using purposive sampling with strata comprising of: age (for CCSs - current age of 10-15/16-24 years; for parents/guardians - age of child at diagnosis:  $\leq 10$ ; 11-18 years); clinical site); and cancer site (haematological malignancy/solid tumour/central nervous system tumour). Diversity in other characteristics (e.g. gender, treatment, time since diagnosis) will be sought to ensure sample heterogeneity and elicitation of a broad range of views and experiences.

Recruitment will continue until data saturation is reached in each interview set, defined as no new themes arising in the last three interviews.<sup>27</sup> We estimate that, interviews with 25-30 CCSs and 25-30 parents/guardians will provide adequate data. CCSs may participate without their parent/guardian taking part, and vice versa.

### WP2: Co-design process

Up to 40 CCSs, parents/guardians of survivors, HCPs and academics/researchers will take part in the co-design process. At least 20 participants will be CCSs (due to the nature of the activities, participation is deemed only to be suitable for CCSs aged 16 and above) and 10 will be parents/guardians. As with the interviews, it will be important to seek diversity in the participants.

HCPs invited to take part in WP2 will include consultant oncologists and nurse specialists from paediatric and teenage and young adult services and other relevant HCPs (e.g. occupational therapists, physiotherapists, psychologists, cardiologists). The aim is that at least six HCPs will participate in the co-design process. Academics/researchers with expertise in the following fields will also participate: behavioural science, health psychology, PA and exercise science, healthcare technologies and human-centred design, and childhood cancer survivorship.

## Identification, screening and recruitment of sample

Identification and screening of CCSs began in February 2019 with recruitment expected to end December 2020.



### WP1: Generating evidence on determinants of PA among CCSs

Employing multiple recruitment strategies can guard against recruitment problems,<sup>28</sup> therefore, we will use up to three methods for recruiting participants. The primary method will require consultant oncologists/nurse specialists to screen attendance lists of forthcoming CCSs follow-up clinics at collaborating sites. At the clinic, eligible CCSs and their parents/guardians will be informed of the study by their child's oncologist/nurse specialist and asked if they would like to meet the researcher (MB). If so, the researcher (MB) will provide further details including the study information sheet and answer any questions. Potentially interested CCSs and parents/guardians will be asked whether the researcher can contact them in a few days to find out whether they would like to participate. Meeting the researcher at clinic will help potential participants feel more at ease and aid the establishment of rapport, which may be particularly important for younger patients.<sup>29</sup>

Approvals are in place for variants of this process in the event that the researcher cannot attend the clinic, or the clinic is too busy for collaborating clinical colleagues to approach eligible CCSs and parents/guardians individually. These include (1) clinical colleagues recording details of those potentially interested of behalf of the researcher, who will follow-up by phone and (2) provision of study packs (containing a reply slip) to eligible CCSs and parents/guardians at clinic check-in with those interested returning the reply slip in a sealed envelope to the receptionist to forward to the researcher.

The second method will involve consultant oncologists/nurse specialists at the two sites screening patients in their care for eligibility and mailing a study information sheet; follow-up telephone calls by the clinical colleagues are permitted. Interested CCSs and parents/guardian may contact the researcher directly.

The third method, if required, will be identification of survivors via cancer registries in the study areas: the Northern Region Young Person's Malignant Disease Registry (NRYPM DR) and the Yorkshire Specialist Register of Cancer in Children and Young People (YSRCCYP).

Information sheets for CCSs are developmentally appropriate and designed for ages 10-12, 13-15 and  $\geq 16$  years. CCSs aged 10-15 years will also receive a copy of the Charter of Rights for Children and Young People in Research.<sup>30</sup> Parents of CCSs aged 10-15 years will receive an information sheet explaining the study their child has been invited to participate in.

### WP2: Co-design process

WP1 participants will be asked if they wish to be notified of/invited to the co-design activities. New participants, without experience of the study, will also be recruited. Methods for recruiting CCSs and their parents/guardians will mirror those of WP1. In addition, we will also seek to recruit via social media, support groups and charities. Posts advertising the study will ask for interested individuals to contact the researcher who will assess eligibility and provide further information.

Eligible HCPs working at the collaborating sites will be invited to take part. We will also promote the study via social media, and through networks of the Childhood Cancer & Leukaemia Group, to encourage participation of HCPs from across UK. Academics and researchers experienced in relevant areas (also previously stated) will also be asked to participate.

## Data collection

### WP1: Generating evidence on determinants of PA among CCSs

Interviews with CCSs aged 10-15 years will take place face-to-face at the interviewee's and their parents preferred location (e.g. university/home). A parent/guardian may be present if they or the child wishes. These interviews are expected to last 30-60 minutes, but length will be determined by the child.

Interviews with CCSs aged  $\geq 16$  years, and those with parents/guardians, will take place by telephone, an end-to-end encrypted web app which enables secure audio/video calls (e.g. WhatsApp, Zoom), or face-to-face at a location of their choosing; providing choice on ways to participate can help maximise recruitment.<sup>28</sup> Experience suggests these interview will last 60-90 minutes<sup>31</sup>, but may be longer if the interviewee wishes.

Before the interview commences, the researcher will seek informed consent; for those aged 10-15 years, a parent/guardian will provide consent and the interviewee assent to ensure that the child feels involved in the decision about their participation.<sup>32</sup> Participants (and parents on behalf of children aged 10-15 years) will be asked to complete a short demographic questionnaire. Time will be spent developing rapport and creating a secure, trusting environment,<sup>28</sup> particularly with younger children.<sup>29</sup>

The interviews will be guided by a topic guide, which will be informed by the Theoretical Domains Framework (TDF), an integrative framework of behaviour change theories,<sup>21 22</sup> and will cover: participant's views and attitudes towards their own/their child's PA; difficulties experienced with, and barriers to, PA; whether support/advice has been given regarding PA; and what helps or would help the survivor to be more active. Questions will be open and neutral. Topic guides will be used flexibly to allow interviewees to raise issues they consider important to the topic (PA); if this results in new areas, these will be explored in subsequent interviews to ensure sufficient depth is reached.

Interview content will be developmentally appropriate. Interviews with children aged 10-15 years will utilise cue cards and images to help engage and focus the participant and provide them with some control over the order of the questions.<sup>29</sup> With the interviewees' permission, interviews will be audio-recorded; if permission for recording is not granted, the researcher will take detailed notes.

### WP2: Co-design process

We will follow the sequential and systematic co-design approach to integrate scientific evidence, expert knowledge and experience, and stakeholder involvement to design a prototype intervention.<sup>24</sup> The two phases of WP2 are described below.

#### *Phase 1: Behavioural analysis*

The researcher team will combine WP1 findings and other formative work previously conducted (e.g. a systematic review) (Figure 1), into a "theoretical model" of PA engagement among CCSs. They will identify which influences on PA are potentially modifiable to determine what needs to be done to change behaviours. The Behaviour Change Wheel will be used to map the TDF domains, and organise these into a working theoretical model of PA in CCSs.<sup>23</sup> For each identified factor the team will identify which intervention functions might be effective in changing PA behaviours. For each of

1  
2  
3 the relevant intervention functions, associated behavioural change techniques will be identified (i.e.  
4 the techniques that can be used to overcome barriers to, and enhance enablers of, engagement with  
5 PA).<sup>33</sup>  
6  
7

### 8 *Phase 2: Co-design process*

9

10 This process will involve a range of methods in order to engage and collaborate with stakeholders  
11 flexibly. Modes of participation will include workshops (face-to-face or online), interviews (one-to-  
12 one or small groups of 2/3 people; face-to-face or online); and online collaborative groups.  
13  
14

15 Face-to-face workshops are expected to last 3-4 hours, while those online will be shorter (1-2 hours).  
16 Interviews are likely to also last 1-2 hours. Video-conferencing is an acceptable method for  
17 discussion with young people and an optimal alternative to face-to-face groups; it also enables  
18 people from various geographical location to attend.<sup>34</sup>  
19

20 Online collaborative groups allow stakeholders to engage with the development process, and one  
21 another, both in real time and asynchronously. Secure groups will be set up via WhatsApp, Facebook  
22 or an Ideaboard.co.uk website developed specifically for the study. WhatsApp and Facebook are  
23 widely used and familiar applications, and have successfully been used for co-design<sup>35 36</sup>; Ideaboard  
24 offers greater flexibility. Preferences of potential participants will inform the choice of platform. The  
25 team will post content to the groups (e.g. videos, images, questions) and invite feedback.  
26  
27

28 Following PPI input, CCSs will have the choice to participate in a survivor only or mixed (survivors  
29 plus parents/HCPs) workshop/small group interview/collaborative group.  
30

31 Using these methods, a range of activities (e.g. think aloud, mapping, brainstorming, storyboarding)  
32 will be used to engage participants, provide ways for them to share, envision and develop their ideas  
33 with others and to facilitate interaction. The specific activities will be dictated by the findings of  
34 WP1, and the findings of any preceding workshops.  
35  
36

37 Two steps in the co-design process are envisioned (Figure 1). In the first step, evidence statements  
38 on PA among CCSs will be presented. Stakeholders' views on the relevance, importance and  
39 effectiveness will be sought. Activities will be used to generate insights into what is needed to  
40 improve PA levels in CCSs and novel intervention ideas which stakeholders think could be effective  
41 and acceptable in improving PA in CCSs. Ideas will also be sought for how an intervention should be  
42 designed, where and how it should be implemented, and the relevant components. Mapping  
43 activities will enable organisation and visualisation of resulting intervention ideas and their key  
44 components. The research team will analyse information collected to develop 'intervention  
45 principles', ensuring that the evidence and theory, which is central to the success of the  
46 intervention, remains intact.<sup>37</sup>  
47  
48

49 During the second stage activities will focus on gaining user feedback on intervention principles.  
50 Content and mode of delivery will be further developed and refined. Intervention tailoring will also  
51 be considered. Participants will identify and discuss potential challenges around acceptability,  
52 usability and feasibility from different perspectives (e.g. CCSs, parents, HCPs, commissioners, service  
53 providers). Based on participants discussion and decisions, designers/creative facilitators will begin  
54 to sketch paper-based 'mock-ups' of the intervention.  
55  
56

57 Outputs will be critically evaluated and translated into a design brief which details the aims of the  
58 intervention, the design features it will include, and how these will be operationalised, taking care  
59 will to ensure alignment with evidence and theory. A logic model will be developed,<sup>14</sup> providing a  
60

graphical/textual representation of how the intervention is intended to work, linking outcomes with processes, the underlying theoretical assumptions and active ingredients (or the behaviour change methods and techniques that will be used to target the identified processes/mechanism associated with behaviour and behaviour change).<sup>33 38</sup> The outcome will be a mock-up of the prototype which will represent the main features of the intervention. This prototype will be ready to take into production and undergo refinement and optimisation before going forward into further testing in a future study.

Prior to participation in co-design activities, informed consent will be sought and a ground rules for communication and engagement established. The researchers will ensure an atmosphere which is welcoming and non-judgemental and will be clear that all participants are treated as equals whether they are young people, parents, researchers or HCPs.

Where possible, co-design activities will be audio or video recorded and transcribed. Other data collected will include written data/notes, mapping activities and sketches resulting from the various activities (e.g. group work, brainstorm) and written comments generated by the online collaborative groups.

## Data analysis plan

### WP1: Generating evidence on determinants of PA among CCSs

Interview recordings will be transcribed verbatim. Analysis will occur in parallel with data collection to ensure that any new issues raised are explored in subsequent interviews. Interviews from CCSs and parents/guardians will be analysed separately. To identify views and experiences of, and barriers and facilitators to, PA in CCSs an inductive thematic analysis will be conducted.<sup>39</sup> Two team members will code data from preliminary interviews and discuss and agree the emerging codes and potential themes. Codes relating to the barriers and facilitators to PA will be mapped onto the TDF.<sup>21 22</sup> These codes will then be applied by the researcher to remaining interviews, incorporating any new codes and themes as they are identified. For analytical rigour, the classification of belief statements to the TDF domains will be discussed and agreed within the team. Coding and analysis will be facilitated by QSR International's NVivo software (Version 12, 2018).

### WP2: Co-design activities

Analysis of co-design activities will be focused specifically on the aims of each activity, pragmatic and expeditious so findings can be fed into subsequent stages.<sup>37</sup> Qualitative content analysis will be performed using QSR International's NVivo software (Version 12, 2018), supplemented by other forms of analysis as required.

## Ethics

A favourable opinion has been granted from the North East - Tyne & Wear South Research Ethics Committee (REC ref: 18/NE/0274).

Informed consent will be sought prior to participation. Participants will be informed that participation is entirely voluntary, and they may withdraw at any point, without giving a reason and without negative consequences. They will be asked for their agreement to audio/video record

1  
2  
3 (where relevant) and informed that recordings are confidential, and transcriptions of audio-  
4 recordings will be anonymised. Ethical considerations relating to the interviewing of children (aged  
5 under 16 years) are described above. Interview participants will be offered payment of any travel  
6 expenses and a high-street shopping voucher. Participants in co-design activities will receive  
7 payment in line with INVOLVE guidance.<sup>40</sup>  
8  
9

### 10 11 12 **Patient and public involvement and project steering group**

13 Feedback on the study concept and methods were gained from Young Person's Group – North  
14 England (YPAG-NE), an established adult cancer survivor group (Perspectives) and two European  
15 organisations for childhood cancer survivors. YPAG-NE and two adult CCSs provided comments on  
16 patient information and interview topic guides/cue cards. Patient representatives sit on the project  
17 steering group, and will be involved in data interpretation, co-design activities, and advising on  
18 dissemination.  
19  
20

### 21 22 23 **Dissemination**

24 Findings will be disseminated via our study website (<https://research.ncl.ac.uk/beingactive/>),  
25 conferences and journal publication. A summary of research findings will be available for  
26 participants. PPI will inform further dissemination activities (e.g. via patient organisations, social  
27 media), appropriate formats (e.g. infographics, video) and content to ensure lay summaries are  
28 understandable and engaging to survivors.  
29  
30  
31  
32  
33

### 34 35 **DISCUSSION**

36 A high proportion of adolescents and young adults do not meet recommended levels of PA,<sup>41</sup> and  
37 there are already many publicly available programmes and interventions to encourage PA, including  
38 government/health service initiatives and apps.<sup>42-44</sup> This raises the question of whether a specific PA  
39 intervention is needed for CCS. While there is considerable overlap between determinants of PA in  
40 CCS and young people without cancer, many influences are likely specific to CCS (e.g. cancer-related  
41 fatigue, frustration about impact of cancer).<sup>13</sup> There are also concerns about the quality and likely  
42 effectiveness of many of the publicly-available PA programmes.<sup>44</sup> In addition, cancer survivors may  
43 question the relevance of general (ie non-cancer specific) PA programmes to them,<sup>45</sup> and there is  
44 evidence that tailoring interventions to a specific target population is likely to increase  
45 effectiveness.<sup>46</sup> Taken together, this suggests that the route most likely to lead to changes in CCSs'  
46 PA levels is to develop an intervention specifically for this group.  
47  
48

49 The final output from this phase of the BEACON study will be a prototype evidence-based and  
50 theoretically-informed intervention. The next step will be to fully operationalise the intervention and  
51 any supporting materials (e.g. training manual). Efficient and systematic user pre-testing studies will  
52 be conducted to provide insight into different aspects of the intervention and iteratively refine and  
53 optimise it.<sup>37</sup> Subsequently, as recommended in the area of PA research,<sup>47</sup> we plan to assess  
54 feasibility and acceptability to users and, following that, evaluate effectiveness and cost-  
55 effectiveness in a randomised controlled trial, with a parallel process evaluation.<sup>48</sup>  
56  
57

58 Various organisations, including the American Cancer Society<sup>49</sup> and Macmillan Cancer Support,<sup>50</sup>  
59 have produced PA recommendations for cancer survivors (of all ages). However, understanding  
60

1  
2  
3 remains limited on how best to support survivors to improve levels of PA and maintain changes.<sup>51 52</sup>  
4 The study described here – although it focuses on CCSs – provides an example of how to use a  
5 behavioural science approach to develop a person-centred, evidence-based and theoretically-  
6 informed PA intervention and, therefore, may be informative for those interested in systematically  
7 developing PA interventions for other survivor groups.  
8  
9  
10  
11  
12

### 13 **Author contributions**

14 MB, LS, RS and VAS conceived the study. MB, LS, RS, VAS, NS and AG developed the grant proposal  
15 and secured funding. MB managed the ethical and research approvals and will undertake the field  
16 work and data analysis supported primarily by LS and VAS. RS, AG and NS will support recruitment of  
17 participants. JH & OB have, and will continue to, provide PPI input. JS and KM will provide specialist  
18 advice and expertise throughout the study. MB drafted the manuscript, and AG, JS, LS, RS, KM, NS,  
19 VAS provided revisions and comments. All authors approved the final manuscript.  
20  
21  
22  
23

24 **Funding statement:** This work is supported by Children’s Cancer and Leukaemia Group grant number  
25 CCLGA 2017 26, the North of England Children’s Cancer Research Fund and the Children’s Cancer  
26 Fund.  
27  
28  
29

30 **Competing interests statement:** No interests to declare.  
31  
32  
33

34 **Figure 1:** Overview of planned research for the BEACON project

35  
36 **Table 1:** Domains, actions and planned methods to develop physical activity intervention for  
37 childhood cancer survivors  
38

39 **Table 2:** Childhood cancer survivors’ inclusion and exclusion criteria  
40  
41  
42  
43  
44  
45  
46  
47  
48  
49  
50  
51  
52  
53  
54  
55  
56  
57  
58  
59  
60



## REFERENCES

1. Children's Cancer and Leukaemia Group. Contact, 2016. [Available from: <https://www.cclg.org.uk/Resource-Collection?id=6705c96b-61c6-421d-9219-769cf9606b28>]
2. Haupt R, Essiaf S, Dellacasa C, et al. The 'Survivorship Passport' for childhood cancer survivors. *Eur J Cancer* 2018;102:69-81. doi: <https://doi.org/10.1016/j.ejca.2018.07.006>
3. Oeffinger KC, Mertens AC, Sklar CA, et al. Chronic health conditions in adult survivors of childhood cancer. *N Engl J Med* 2006;355(15):1572-82. doi: 10.1056/NEJMsa060185
4. Lipshultz SE, Adams MJ, Colan SD, et al. Long-term cardiovascular toxicity in children, adolescents, and young adults who receive cancer therapy: pathophysiology, course, monitoring, management, prevention, and research directions: a scientific statement from the American Heart Association. *Circulation* 2013;128(17):1927-95. doi: 10.1161/CIR.0b013e3182a88099
5. Fidler MM, Reulen RC, Henson K, et al. Population-based long-term cardiac-specific mortality among 34 489 five-year survivors of childhood cancer in Great Britain. *Circulation* 2017;135(10):951-63. doi: 10.1161/CIRCULATIONAHA.116.024811
6. World Heart Foundation. Risk factors 2020 [Available from: <https://www.world-heart-federation.org/resources/risk-factors/> accessed 06/03/2020.
7. Slater ME, Steinberger J, Ross JA, et al. Physical activity, fitness, and cardiometabolic risk factors in adult survivors of childhood cancer with a history of hematopoietic cell transplantation. *Biol Blood Marrow Transplant* 2015;21(7):1278-83. doi: 10.1016/j.bbmt.2015.04.007
8. Zhang FF, Saltzman E, Must A, et al. Do Childhood Cancer Survivors Meet the Diet and Physical Activity Guidelines? A Review of Guidelines and Literature. *Int J Child Health Nutr* 2012;1(1):44-58. doi: 10.6000/1929-4247.2012.01.01.06 [published Online First: 2012/01/01]
9. Jones LW, Liu Q, Armstrong GT, et al. Exercise and risk of major cardiovascular events in adult survivors of childhood hodgkin lymphoma: a report from the childhood cancer survivor study. *J Clin Oncol* 2014;32(32):3643-50. doi: 10.1200/JCO.2014.56.7511
10. Braam KI, van der Torre P, Takken T, et al. Physical exercise training interventions for children and young adults during and after treatment for childhood cancer. *Cochrane Database Syst Rev* 2016(3) doi: 10.1002/14651858.CD008796.pub3
11. Pugh G, Gravestock HL, Hough RE, et al. Health behavior change interventions for teenage and young adult cancer survivors: a systematic review. *J Adolesc Young Adult Oncol* 2016;5(2):91-105. doi: 10.1089/jayao.2015.0042
12. Kopp LM, Gastelum Z, Guerrero CH, et al. Lifestyle behavior interventions delivered using technology in childhood, adolescent, and young adult cancer survivors: a systematic review. *Pediatr Blood Cancer* 2017;64(1):13-17. doi: 10.1002/pbc.26166
13. Brown MC, Sharp L, Skinner R, Sneihotta FF, Araujo-Soares A. The development of health behaviour change interventions for childhood cancer survivors: the need for a behavioural science approach. *Pediatr Blood Cancer* 2020;In press
14. Bartholomew Eldredge LK, Markham, C. M., Ruiter, R. A. C., Fernandez, M. E., Kok, G., & Parcel, G. S. Planning health promotion programs: an intervention mapping approach 4th ed. San Francisco, CA: Jossey-Bass. 2016.
15. Craig P, Dieppe P, Macintyre S, et al. Developing and evaluating complex interventions: the new Medical Research Council guidance. *BMJ* 2008;337 doi: 10.1136/bmj.a1655
16. O'Cathain A, Croot L, Sworn K, et al. Taxonomy of approaches to developing interventions to improve health: a systematic methods overview. *BMC Pilot Feasibility Stud* 2019;5:41. doi: 10.1186/s40814-019-0425-6 [published Online First: 2019/03/30]
17. O'Cathain A, Croot L, Duncan E, et al. Guidance on how to develop complex interventions to improve health and healthcare. *BMJ Open* 2019;9(8):e029954. doi: 10.1136/bmjopen-2019-029954 [published Online First: 2019/08/20]

18. Yardley L, Morrison L, Bradbury K, et al. The person-based approach to intervention development: application to digital health-related behavior change interventions. *J Med Internet Res* 2015;17(1):e30. doi: 10.2196/jmir.4055
19. Martins J, Marques A, Sarmiento H, et al. Adolescents' perspectives on the barriers and facilitators of physical activity: a systematic review of qualitative studies. *Health Educ Res* 2015;30(5):742-55. doi: 10.1093/her/cyv042 [published Online First: 2015/09/02]
20. Brunton G, Thomas J, Harden A, et al. Promoting physical activity amongst children outside of physical education classes: A systematic review integrating intervention studies and qualitative studies. *Health Educ J* 2005;64(4):323-38. doi: 10.1177/001789690506400404
21. Michie S, Johnston M, Abraham C, et al. Making psychological theory useful for implementing evidence based practice: a consensus approach. *Qual Saf Health Care* 2005;14 doi: 10.1136/qshc.2004.011155
22. Cane J, O'Connor D, Michie S. Validation of the theoretical domains framework for use in behaviour change and implementation research. *Implement Sci* 2012;7(1):37. doi: 10.1186/1748-5908-7-37
23. Michie S, van Stralen M, West R. The Behaviour Change Wheel: a new method for characterising and designing behaviour change interventions. *Implement Sci* 2011;6 doi: 10.1186/1748-5908-6-42
24. O'Brien N, Heaven B, Teal G, et al. Integrating Evidence From Systematic Reviews, Qualitative Research, and Expert Knowledge Using Co-Design Techniques to Develop a Web-Based Intervention for People in the Retirement Transition. *J Med Internet Res* 2016;18(8):e210. doi: 10.2196/jmir.5790
25. Murray E, Treweek S, Pope C, et al. Normalisation process theory: a framework for developing, evaluating and implementing complex interventions. *BMC Med* 2010;8(1):63. doi: 10.1186/1741-7015-8-63
26. Glasgow RE, Vogt TM, Boles SM. Evaluating the public health impact of health promotion interventions: the RE-AIM framework. *Am J Public Health* 1999;89(9):1322-7. doi: 10.2105/ajph.89.9.1322
27. Francis JJ, Johnston M, Robertson C, et al. What is an adequate sample size? Operationalising data saturation for theory-based interview studies. *Psychol Health* 2010;25(10):1229-45. doi: 10.1080/08870440903194015
28. Bamidele OO, H EM, Lagan BM, et al. "Hard to reach, but not out of reach": Barriers and facilitators to recruiting Black African and Black Caribbean men with prostate cancer and their partners into qualitative research. *Eur J Cancer Care (Engl)* 2019;28(2):e12977. doi: 10.1111/ecc.12977
29. Fargas-Malet M, McSherry D, Larkin E, et al. research with children: methodological issues and innovative techniques. *J Early Child Res* 2010;8(2):175-92. doi: 10.1177/1476718x09345412
30. Institute of Child Protection Studies. A Charter of Rights for Children and Young People [poster]. 2016.
31. Brown MC, Pearce MS, Bailey S, et al. The long-term psychosocial impact of cancer: the views of young adult survivors of childhood cancer. *Eur J Cancer Care (Engl)* 2016;25(3):428-39. doi: 10.1111/ecc.12380
32. Nuffield Council on Bioethics. Children and clinical research: ethical issues, 2015.
33. Michie S, Ashford S, Sniehotta FF, et al. A refined taxonomy of behaviour change techniques to help people change their physical activity and healthy eating behaviours: the CALO-RE taxonomy. *Psychol Health* 2011;26(11):1479-98. doi: 10.1080/08870446.2010.540664
34. Han J, Torok M, Gale N, et al. Use of web conferencing technology for conducting online focus groups among young people with lived experience of suicidal thoughts: mixed methods research. *JMIR Ment Health* 2019;6(10):e14191. doi: 10.2196/14191



- 1
- 2
- 3
- 4 35. Leapfrog. Be Included: reflecting on the use of social media for co-designing 2020 [Available
- 5 from: [http://leapfrog.tools/blog/be-included-reflecting-on-the-use-of-social-media-for-co-](http://leapfrog.tools/blog/be-included-reflecting-on-the-use-of-social-media-for-co-designing/)
- 6 [designing/](http://leapfrog.tools/blog/be-included-reflecting-on-the-use-of-social-media-for-co-designing/) accessed 11/04/2020.
- 7 36. Thrul J, Belohlavek A, Hambrick DA, et al. Conducting online focus groups on Facebook to inform
- 8 health behavior change interventions: two case studies and lessons learned. *Internet*
- 9 *Interventions* 2017;9:106-11. doi: <https://doi.org/10.1016/j.invent.2017.07.005>
- 10 37. Bradbury K, Morton K, Band R, et al. Using the Person-Based Approach to optimise a digital
- 11 intervention for the management of hypertension. *PLoS One* 2018;13(5):e0196868. doi:
- 12 [10.1371/journal.pone.0196868](https://doi.org/10.1371/journal.pone.0196868) [published Online First: 2018/05/04]
- 13 38. Kok G, Gottlieb NH, Peters GJ, et al. A taxonomy of behaviour change methods: an Intervention
- 14 Mapping approach. *Health Psychol Rev* 2016;10(3):297-312. doi:
- 15 [10.1080/17437199.2015.1077155](https://doi.org/10.1080/17437199.2015.1077155)
- 16 39. Braun V CV. Successful qualitative research: a practical guide for beginners. London: SAGE 2013.
- 17 40. INVOLVE. Policy on payment of fees and expenses for members of the public actively involved
- 18 with INVOLVE, 2016. [Available from: [https://www.invo.org.uk/wp-](https://www.invo.org.uk/wp-content/uploads/2016/05/INVOLVE-internal-payment-policy-2016-final-1.pdf)
- 19 [content/uploads/2016/05/INVOLVE-internal-payment-policy-2016-final-1.pdf](https://www.invo.org.uk/wp-content/uploads/2016/05/INVOLVE-internal-payment-policy-2016-final-1.pdf)]
- 20 41. World Health Organization Regional Office for Europe. United Kingdom Physical Activity
- 21 Factsheet 2018 [Available from:
- 22 [http://www.euro.who.int/\\_\\_data/assets/pdf\\_file/0004/382585/united-kingdom-](http://www.euro.who.int/__data/assets/pdf_file/0004/382585/united-kingdom-eng.pdf?ua=1)
- 23 [eng.pdf?ua=1](http://www.euro.who.int/__data/assets/pdf_file/0004/382585/united-kingdom-eng.pdf?ua=1)]
- 24 42. National Health Service. Get active your way 2018 [Available from: [https://www.nhs.uk/live-](https://www.nhs.uk/live-well/exercise/get-active-your-way/)
- 25 [well/exercise/get-active-your-way/](https://www.nhs.uk/live-well/exercise/get-active-your-way/)].
- 26 43. Sport Australia. Find your 30 2020 [Available from: <https://www.sportaus.gov.au/findyour30>].
- 27 44. Bondaronek P, Alkhalidi G, Slee A, et al. Quality of Publicly Available Physical Activity Apps:
- 28 Review and Content Analysis. *JMIR Mhealth Uhealth* 2018;6(3):e53-e53. doi:
- 29 [10.2196/mhealth.9069](https://doi.org/10.2196/mhealth.9069)
- 30 45. Roberts AL, Potts HW, Koutoukidis DA, et al. Breast, prostate, and colorectal cancer survivors'
- 31 experiences of using publicly available physical activity mobile apps: qualitative Study. *JMIR*
- 32 *Mhealth Uhealth* 2019;7(1):e10918-e18. doi: [10.2196/10918](https://doi.org/10.2196/10918)
- 33 46. Bradbury K, Steele M, Corbett T, et al. Developing a digital intervention for cancer survivors: an
- 34 evidence-, theory- and person-based approach. *NPJ Digit Med* 2019;2:85. doi:
- 35 [10.1038/s41746-019-0163-4](https://doi.org/10.1038/s41746-019-0163-4)
- 36 47. El-Kotob R, Giangregorio LM. Pilot and feasibility studies in exercise, physical activity, or
- 37 rehabilitation research. *Pilot Feasibility Stud* 2018;4:137-37. doi: [10.1186/s40814-018-0326-](https://doi.org/10.1186/s40814-018-0326-0)
- 38 [0](https://doi.org/10.1186/s40814-018-0326-0)
- 39 48. Moore GF, Audrey S, Barker M, et al. Process evaluation of complex interventions: Medical
- 40 Research Council guidance. *BMJ* 2015;350:h1258. doi: [10.1136/bmj.h1258](https://doi.org/10.1136/bmj.h1258)
- 41 49. American Cancer Society. ACS Guidelines on Nutrition and Physical Activity for Cancer Prevention
- 42 2020 [Available from: [https://www.cancer.org/healthy/eat-healthy-get-active/acs-](https://www.cancer.org/healthy/eat-healthy-get-active/acs-guidelines-nutrition-physical-activity-cancer-prevention.html)
- 43 [guidelines-nutrition-physical-activity-cancer-prevention.html](https://www.cancer.org/healthy/eat-healthy-get-active/acs-guidelines-nutrition-physical-activity-cancer-prevention.html)].
- 44 50. Macmillan Cancer Support. Physical Activity 2020 [Available from:
- 45 [https://www.macmillan.org.uk/about-us/health-professionals/programmes-and-](https://www.macmillan.org.uk/about-us/health-professionals/programmes-and-services/physical-activity)
- 46 [services/physical-activity](https://www.macmillan.org.uk/about-us/health-professionals/programmes-and-services/physical-activity)]
- 47 51. Grimmett C, Corbett T, Brunet J, et al. Systematic review and meta-analysis of maintenance of
- 48 physical activity behaviour change in cancer survivors. *Int J Behav Nutr Phys Act*
- 49 2019;16(1):37-37. doi: [10.1186/s12966-019-0787-4](https://doi.org/10.1186/s12966-019-0787-4)
- 50 52. Turner RR, Steed L, Quirk H, et al. Interventions for promoting habitual exercise in people living
- 51 with and beyond cancer. *Cochrane Database Syst Rev* 2018(9) doi:
- 52 [10.1002/14651858.CD010192.pub3](https://doi.org/10.1002/14651858.CD010192.pub3)
- 53
- 54
- 55
- 56
- 57
- 58
- 59
- 60

**Table 1: Domains, actions and planned methods to develop physical activity intervention for childhood cancer survivors**

| Key actions to consider for intervention development <sup>16</sup>                                                                                                                                | Domain of intervention development and associated specific action(s) <sup>15</sup>                                                                         | Methods utilised, or planned in this research to develop intervention                                                                                                                                                                                                                                                                                                                                                                                                                                                                                                                         |
|---------------------------------------------------------------------------------------------------------------------------------------------------------------------------------------------------|------------------------------------------------------------------------------------------------------------------------------------------------------------|-----------------------------------------------------------------------------------------------------------------------------------------------------------------------------------------------------------------------------------------------------------------------------------------------------------------------------------------------------------------------------------------------------------------------------------------------------------------------------------------------------------------------------------------------------------------------------------------------|
| Planning the process<br>Involving stakeholders<br>Bringing together a team                                                                                                                        | <b>Conception</b>                                                                                                                                          |                                                                                                                                                                                                                                                                                                                                                                                                                                                                                                                                                                                               |
|                                                                                                                                                                                                   | 1. Identifying the problem in need of a new intervention (including the health problem, the problematic behaviour and the target population)               | <ul style="list-style-type: none"> <li>• Identification and evaluation of the literature on:                             <ul style="list-style-type: none"> <li>- Prevalence of cardiovascular late effects in CCSs</li> <li>- Low PA in CCSs</li> <li>- Benefit of PA to the health of CCSs</li> </ul> </li> <li>• Clinical experience/knowledge of low PA in CCSs.</li> </ul>                                                                                                                                                                                                               |
|                                                                                                                                                                                                   | <b>Planning</b>                                                                                                                                            |                                                                                                                                                                                                                                                                                                                                                                                                                                                                                                                                                                                               |
|                                                                                                                                                                                                   | 2. Setting up a planning group/development team                                                                                                            | <ul style="list-style-type: none"> <li>• Establishing a multidisciplinary steering group involving:                             <ul style="list-style-type: none"> <li>- Researchers and academics with expertise in health psychology, behavioural science/intervention development, exercise physiology, PA interventions in clinical populations, digital health innovation.</li> <li>- HCPs and service providers (consultant oncologists, nurse specialists).</li> <li>- Patient representatives.</li> </ul> </li> </ul>                                                                 |
| Reviewing published evidence<br>Undertaking primary data collection<br>Drawing on existing theories<br>Articulate programme theory<br>Understanding context<br>Attending to future implementation | 3. Understanding the problem to be addressed<br><br><i>i. Understanding the views and experiences and psycho-social of the potential target population</i> | <ul style="list-style-type: none"> <li>• Use of patient and public involvement during initial stages of planning:                             <ul style="list-style-type: none"> <li>- Gaining young peoples' views of PA and the study concept via an NHS young persons' advisory group</li> <li>- Consultation with CCSs on the need for PA interventions via focus group and survey methods</li> </ul> </li> <li>• Identification of literature reporting HCPs (who may be involved in the resulting intervention) views of PA in CCSs, and the provision of PA advice to CCSs.</li> </ul> |
|                                                                                                                                                                                                   | <i>ii. Assessing the causes of the problems</i>                                                                                                            | <ul style="list-style-type: none"> <li>• Undertaking research to explore and understand CCSs views and experiences of PA                             <ul style="list-style-type: none"> <li>- Literature review of the barriers and facilitators to PA in CCSs</li> <li>- Undertaking in-depth interviews with CCSs and their parents regarding their views and experiences of PA, including perceived barriers and facilitators (informed by the Theoretical Domains Framework)</li> <li>- Creating a logic model of the problem</li> </ul> </li> </ul>                                      |
|                                                                                                                                                                                                   | <i>iii. Describing and understanding the wider context of the target population and the context in which the intervention will be implemented</i>          | <ul style="list-style-type: none"> <li>• Undertaking research to explore the views of CCSs views of receiving lifestyle/PA advice in follow-up care.                             <ul style="list-style-type: none"> <li>- Survey and interviews with CCSs attending follow-up care</li> </ul> </li> <li>• Involving HCPs, service providers and patients in steering group and in co-production of intervention.</li> </ul>                                                                                                                                                                   |
|                                                                                                                                                                                                   | <i>iv. Identifying the effectiveness of interventions for PA in CCSs</i>                                                                                   | <ul style="list-style-type: none"> <li>• Identification and evaluation of existing PA interventions in CCSs.                             <ul style="list-style-type: none"> <li>- Systematic reviews of PA interventions in CCSs</li> <li>- Research evaluating PA interventions in CCSs</li> </ul> </li> </ul>                                                                                                                                                                                                                                                                               |
|                                                                                                                                                                                                   | <i>v. Understanding wider stakeholders' perspectives of problems and issues</i>                                                                            | <ul style="list-style-type: none"> <li>• Actively engage with stakeholders, service providers and patients throughout research and in co-production of intervention.</li> </ul>                                                                                                                                                                                                                                                                                                                                                                                                               |

|    |                                     |                                                                                                                                                                                                                                                                                                                                                                  |
|----|-------------------------------------|------------------------------------------------------------------------------------------------------------------------------------------------------------------------------------------------------------------------------------------------------------------------------------------------------------------------------------------------------------------|
| 1  |                                     |                                                                                                                                                                                                                                                                                                                                                                  |
| 2  |                                     |                                                                                                                                                                                                                                                                                                                                                                  |
| 3  |                                     |                                                                                                                                                                                                                                                                                                                                                                  |
| 4  |                                     |                                                                                                                                                                                                                                                                                                                                                                  |
| 5  |                                     |                                                                                                                                                                                                                                                                                                                                                                  |
| 6  | Drawing on existing theories        | 4. <i>Making decisions about aims and goals of intervention</i>                                                                                                                                                                                                                                                                                                  |
| 7  |                                     | Based on the evidence generated in WP1, the steering group and research team will make decisions on the specific aims and goals of intervention. These will be presented and discussed in co-design workshops.                                                                                                                                                   |
| 8  | Articulating programme theory       | 5. <i>Identifying what needs to change, how to bring about change</i>                                                                                                                                                                                                                                                                                            |
| 9  |                                     | Following WP1 a logical model of change will be developed for PA in CCS drawing on the evidence and constructs from relevant theories.                                                                                                                                                                                                                           |
| 10 | Understanding context               | 6. <i>Specify who will change, how and when</i>                                                                                                                                                                                                                                                                                                                  |
| 11 |                                     | <ul style="list-style-type: none"> <li>Following WP1 the steering group and research team will break down the behavioural outcomes to consider, prioritise and map who needs to change what, how changes will occur as a result of the intervention and when these changes are expected to take place.</li> </ul>                                                |
| 12 | Attending to future implementation  | 7. <i>Considering the real-world issues about cost and delivery of any intervention to reduce risk of implementation failure</i>                                                                                                                                                                                                                                 |
| 13 |                                     | <ul style="list-style-type: none"> <li>Involvement of HCPs/service providers in development team</li> <li>Co-design workshops with stakeholders (including HCPs)</li> <li>Use of Normalisation Theory Process to inform discussion with HCPs</li> </ul>                                                                                                          |
| 14 |                                     | 8. <i>Considering whether it is worthwhile continuing with development of intervention</i>                                                                                                                                                                                                                                                                       |
| 15 |                                     | <ul style="list-style-type: none"> <li>Steering group and stakeholder input on feasibility of intervention</li> </ul>                                                                                                                                                                                                                                            |
| 16 |                                     |                                                                                                                                                                                                                                                                                                                                                                  |
| 17 |                                     |                                                                                                                                                                                                                                                                                                                                                                  |
| 18 |                                     |                                                                                                                                                                                                                                                                                                                                                                  |
| 19 |                                     |                                                                                                                                                                                                                                                                                                                                                                  |
| 20 |                                     |                                                                                                                                                                                                                                                                                                                                                                  |
| 21 |                                     |                                                                                                                                                                                                                                                                                                                                                                  |
| 22 |                                     |                                                                                                                                                                                                                                                                                                                                                                  |
| 23 |                                     | <b>Designing</b>                                                                                                                                                                                                                                                                                                                                                 |
| 24 |                                     |                                                                                                                                                                                                                                                                                                                                                                  |
| 25 |                                     | 9. <i>Generating ideas about solutions and components and features of an intervention</i>                                                                                                                                                                                                                                                                        |
| 26 |                                     | <ul style="list-style-type: none"> <li>Mapping of behavioural determinants onto behaviour change techniques using Behaviour Change Wheel.</li> <li>Co-design workshops using creative methods and activities to enable idea generation</li> </ul>                                                                                                                |
| 27 |                                     | 10. <i>Re-visit decisions about where to intervene</i>                                                                                                                                                                                                                                                                                                           |
| 28 |                                     | <ul style="list-style-type: none"> <li>Input from stakeholders to make final decisions regarding the scope, the target population, key features and components of intervention which will be further refined during workshops.</li> </ul>                                                                                                                        |
| 29 |                                     |                                                                                                                                                                                                                                                                                                                                                                  |
| 30 |                                     |                                                                                                                                                                                                                                                                                                                                                                  |
| 31 |                                     |                                                                                                                                                                                                                                                                                                                                                                  |
| 32 |                                     |                                                                                                                                                                                                                                                                                                                                                                  |
| 33 |                                     |                                                                                                                                                                                                                                                                                                                                                                  |
| 34 | Designing and refining intervention | 11. <i>Make decisions about the content, format and delivery of the intervention</i>                                                                                                                                                                                                                                                                             |
| 35 |                                     | <ul style="list-style-type: none"> <li>Findings of WP1 will be combined into a theoretical model of PA in CCSs and to develop initial ideas about content, format and delivery.</li> <li>Actively engaging with steering group and stakeholders via co-design workshops to obtain views on the potential content, format and delivery of intervention</li> </ul> |
| 36 |                                     | 12. <i>Design an implementation plan, thinking about who will adopt the intervention and maintain it</i>                                                                                                                                                                                                                                                         |
| 37 |                                     | <ul style="list-style-type: none"> <li>Design of potential implementation plan will be informed by discussions with HCPs and other stakeholder regarding potential implementation barriers and previous research.</li> </ul>                                                                                                                                     |
| 38 |                                     | <b>Creating</b>                                                                                                                                                                                                                                                                                                                                                  |
| 39 |                                     |                                                                                                                                                                                                                                                                                                                                                                  |
| 40 |                                     | 13. <i>Make prototypes/mock-ups of the intervention where relevant</i>                                                                                                                                                                                                                                                                                           |
| 41 |                                     | <ul style="list-style-type: none"> <li>Generation and discussion of mock-ups and paper-based prototypes during co-design workshop. Feedback</li> </ul>                                                                                                                                                                                                           |
| 42 |                                     |                                                                                                                                                                                                                                                                                                                                                                  |
| 43 |                                     |                                                                                                                                                                                                                                                                                                                                                                  |
| 44 |                                     |                                                                                                                                                                                                                                                                                                                                                                  |
| 45 |                                     |                                                                                                                                                                                                                                                                                                                                                                  |
| 46 |                                     |                                                                                                                                                                                                                                                                                                                                                                  |
| 47 |                                     |                                                                                                                                                                                                                                                                                                                                                                  |
| 48 |                                     |                                                                                                                                                                                                                                                                                                                                                                  |
| 49 |                                     |                                                                                                                                                                                                                                                                                                                                                                  |
| 50 |                                     |                                                                                                                                                                                                                                                                                                                                                                  |
| 51 |                                     |                                                                                                                                                                                                                                                                                                                                                                  |
| 52 |                                     |                                                                                                                                                                                                                                                                                                                                                                  |
| 53 |                                     |                                                                                                                                                                                                                                                                                                                                                                  |
| 54 |                                     |                                                                                                                                                                                                                                                                                                                                                                  |
| 55 |                                     |                                                                                                                                                                                                                                                                                                                                                                  |
| 56 |                                     |                                                                                                                                                                                                                                                                                                                                                                  |
| 57 |                                     |                                                                                                                                                                                                                                                                                                                                                                  |
| 58 |                                     |                                                                                                                                                                                                                                                                                                                                                                  |
| 59 |                                     |                                                                                                                                                                                                                                                                                                                                                                  |
| 60 |                                     |                                                                                                                                                                                                                                                                                                                                                                  |

**Table 2: CCSs' inclusion and exclusion criteria**

| Inclusion criteria                                                                            | Exclusion criteria                                                                                                            |
|-----------------------------------------------------------------------------------------------|-------------------------------------------------------------------------------------------------------------------------------|
| Diagnosed with any haematological malignancy or solid or CNS tumour under the age of 19 years | Any cognitive or physical impairment of sufficient severity to limit their ability to understand, engage with or undertake PA |
| Currently aged 10-24 years                                                                    | Any contraindications to exercise                                                                                             |
| Currently 2-15 years from the end of treatment                                                |                                                                                                                               |
| No active disease                                                                             |                                                                                                                               |

For peer review only

1  
2  
3  
4  
5  
6  
7  
8  
9  
10  
11  
12  
13  
14  
15  
16  
17  
18  
19  
20  
21  
22  
23  
24  
25  
26  
27  
28  
29  
30  
31  
32  
33  
34  
35  
36  
37  
38  
39  
40  
41

Input from steering group and PPI

Workpackage 1

### In-depth interviews informed by theory

To identify perceived barriers and facilitators to physical activity.

Childhood cancer survivors recruited from two NHS trusts

Parents of childhood cancer survivors recruited from two NHS trusts

Thematic analysis of interview data

Previous primary research with childhood cancer survivors and systematic reviews of relevant literature will also inform work package 2

Workpackage 2

### Phase 1: Behavioural analysis

Identifying potentially modifiable determinants of PA in CCSs and developing a theoretical model of PA in CCSs. Identifying potential intervention functions, components and behaviour change techniques.

### Phase 2: Co-design process

**Stage 1 co-design activities**  
Testing evidence statements.  
Generate new ideas for interventions.

**Participants:**  
CCSs, parents, HCPs, academics/researchers.

**Output:**  
Intervention principles.

**Stage 2 co-design activities**  
User feedback on intervention principles.  
Develop core intervention ideas/concepts.  
Design prototypes of potential interventions.

**Participants:**  
CCSs, parents, HCPs, academics/researchers.

**Output:**  
Core concepts.  
Paper prototypes.

Final output: Prototype intervention

Figure 1: Overview of planned research for the BEACON project

# BMJ Open

## Using qualitative and co-design methods to inform the development of an intervention to support and improve physical activity in childhood cancer survivors: a study protocol for BEing Active after ChildhOod caNcer (BEACON)

|                                 |                                                                                                                                                                                                                                                                                                                                                                                                                                                                                                                                                                                                                                                                                                                                                                                                                                                                                                                                                                                                |
|---------------------------------|------------------------------------------------------------------------------------------------------------------------------------------------------------------------------------------------------------------------------------------------------------------------------------------------------------------------------------------------------------------------------------------------------------------------------------------------------------------------------------------------------------------------------------------------------------------------------------------------------------------------------------------------------------------------------------------------------------------------------------------------------------------------------------------------------------------------------------------------------------------------------------------------------------------------------------------------------------------------------------------------|
| Journal:                        | <i>BMJ Open</i>                                                                                                                                                                                                                                                                                                                                                                                                                                                                                                                                                                                                                                                                                                                                                                                                                                                                                                                                                                                |
| Manuscript ID                   | bmjopen-2020-041073.R1                                                                                                                                                                                                                                                                                                                                                                                                                                                                                                                                                                                                                                                                                                                                                                                                                                                                                                                                                                         |
| Article Type:                   | Protocol                                                                                                                                                                                                                                                                                                                                                                                                                                                                                                                                                                                                                                                                                                                                                                                                                                                                                                                                                                                       |
| Date Submitted by the Author:   | 02-Sep-2020                                                                                                                                                                                                                                                                                                                                                                                                                                                                                                                                                                                                                                                                                                                                                                                                                                                                                                                                                                                    |
| Complete List of Authors:       | Brown, Morven; Newcastle University, Newcastle upon Tyne, Population Health Sciences Institute; Newcastle University Centre for Cancer, Araujo-Soares, Vera; Newcastle University, Population Health Sciences Institute; Newcastle University Centre for Cancer<br>Skinner, Roderick; Newcastle University Centre for Cancer; Great North Children's Hospital, Department of Paediatric and Adolescent Haematology and Oncology<br>Glaser, Adam; University of Leeds, Leeds Institute of Medical Research; Leeds Children's Hospital, Department of Paediatric Oncology<br>Sarwar, Naseem; Leeds Children's Hospital, Department of Paediatric Oncology<br>Saxton, John M ; Northumbria University, Department of Sport, Exercise and Rehabilitation, Faculty of Health and Life Sciences<br>Montague, Kyle; Newcastle University, OpenLab<br>Hall, Jamie<br>Burns, Olivia<br>Sharp, Linda; Newcastle University, Population Health Sciences Institute; Newcastle University Centre for Cancer |
| <b>Primary Subject Heading</b>: | Oncology                                                                                                                                                                                                                                                                                                                                                                                                                                                                                                                                                                                                                                                                                                                                                                                                                                                                                                                                                                                       |
| Secondary Subject Heading:      | Qualitative research                                                                                                                                                                                                                                                                                                                                                                                                                                                                                                                                                                                                                                                                                                                                                                                                                                                                                                                                                                           |
| Keywords:                       | Protocols & guidelines < HEALTH SERVICES ADMINISTRATION & MANAGEMENT, Paediatric oncology < ONCOLOGY, QUALITATIVE RESEARCH                                                                                                                                                                                                                                                                                                                                                                                                                                                                                                                                                                                                                                                                                                                                                                                                                                                                     |
|                                 |                                                                                                                                                                                                                                                                                                                                                                                                                                                                                                                                                                                                                                                                                                                                                                                                                                                                                                                                                                                                |

SCHOLARONE™  
Manuscripts



I, the Submitting Author has the right to grant and does grant on behalf of all authors of the Work (as defined in the below author licence), an exclusive licence and/or a non-exclusive licence for contributions from authors who are: i) UK Crown employees; ii) where BMJ has agreed a CC-BY licence shall apply, and/or iii) in accordance with the terms applicable for US Federal Government officers or employees acting as part of their official duties; on a worldwide, perpetual, irrevocable, royalty-free basis to BMJ Publishing Group Ltd ("BMJ") its licensees and where the relevant Journal is co-owned by BMJ to the co-owners of the Journal, to publish the Work in this journal and any other BMJ products and to exploit all rights, as set out in our [licence](#).

The Submitting Author accepts and understands that any supply made under these terms is made by BMJ to the Submitting Author unless you are acting as an employee on behalf of your employer or a postgraduate student of an affiliated institution which is paying any applicable article publishing charge ("APC") for Open Access articles. Where the Submitting Author wishes to make the Work available on an Open Access basis (and intends to pay the relevant APC), the terms of reuse of such Open Access shall be governed by a Creative Commons licence – details of these licences and which [Creative Commons](#) licence will apply to this Work are set out in our licence referred to above.

Other than as permitted in any relevant BMJ Author's Self Archiving Policies, I confirm this Work has not been accepted for publication elsewhere, is not being considered for publication elsewhere and does not duplicate material already published. I confirm all authors consent to publication of this Work and authorise the granting of this licence.



1  
2  
3 **Using qualitative and co-design methods to inform the development of an intervention to support**  
4 **and improve physical activity in childhood cancer survivors: a study protocol for BEing Active after**  
5 **Childhood caNcer (BEACON)**  
6  
7

8  
9 **Morven C Brown<sup>1,2</sup> Vera Araújo-Soares<sup>1,2</sup>, Roderick Skinner<sup>2,3</sup>, Adam W Glaser<sup>4,5</sup>, Naseem Sarwar<sup>4</sup>,**  
10 **John Saxton<sup>6</sup>, Kyle Montague<sup>7</sup>, Jamie Hall<sup>8</sup>, Olivia Burns<sup>8</sup>, Linda Sharp<sup>1,2\*</sup>**  
11  
12

- 13  
14 1. Population Health Sciences Institute, Newcastle University, Newcastle upon Tyne, UK  
15  
16 2. Newcastle University Centre for Cancer, Newcastle University, Newcastle upon Tyne, UK  
17  
18 3. Department of Paediatric and Adolescent Haematology and Oncology, Great North Children's  
19 Hospital, Newcastle upon Tyne Hospitals NHS Trust, Newcastle upon Tyne, UK  
20  
21 4. Department of Paediatric Oncology, Leeds Children's Hospital, Leeds Teaching Hospitals NHS  
22 Trust, Leeds, UK  
23  
24 5. Leeds Institute of Medical Research, University of Leeds, Leeds, UK  
25  
26 6. Department of Sport, Exercise and Rehabilitation, Faculty of Health and Life Sciences,  
27 Northumbria University, Newcastle upon Tyne, UK  
28  
29 7. OpenLab, Newcastle University, Newcastle upon Tyne, UK  
30  
31 8. Patient and public representatives for the study  
32

33 \*Corresponding author: Linda Sharp, Population Health Sciences Institute, Newcastle University, Sir  
34 James Spence Institute, Royal Victoria Infirmary, Queen Victoria Road, NE1 4LP. Email:  
35 linda.sharp@ncl.ac.uk. Tel: +44 191 208 6275  
36  
37  
38

39 **Morven Brown:** morven.brown@ncl.ac.uk

40 **Vera Araújo-Soares:** vera.araujo-soares@ncl.ac.uk

41 **Roderick Skinner:** roderick.skinner@ncl.ac.uk

42 **Adam Glaser:** a.glaser@nhs.net

43 **Naseem Sarwar:** n.sarwar@nhs.net

44 **John Saxton:** john.saxton@northumbria.ac.uk

45 **Kyle Montague:** kyle.montague@ncl.ac.uk

46 **Jamie Hall:** jamie.hall@hotmail.com

47 **Olivia Burns:** oliviaburns96@outlook.com

48 **Linda Sharp:** linda.sharp@ncl.ac.uk

49 **Keywords:** child; cancer survivors; exercise; health behaviour; behavioural sciences

50 **Word count:** 4276  
51  
52  
53  
54  
55  
56  
57  
58  
59  
60



## ABSTRACT

### Introduction:

Childhood cancer survivors (CCSs) treated with cardiotoxic cancer treatments are at increased risk of developing cardiometabolic complications. This risk is further exacerbated by poor health behaviours. In particular, CCSs are less active than non-cancer comparators. Existing interventions aiming to improve physical activity (PA) levels in CCSs are methodologically weak. The aim of this study is to rigorously and systematically develop an evidence- and theory-based intervention to promote, support, improve and sustain PA levels in CCSs, with the long-term goal of reducing CCSs' cardiovascular morbidity and mortality.

### Methods and analysis:

The Being Active after Childhood Cancer (BEACON) study involves two workpackages at two NHS sites in England, UK. *Participants:* CCSs and their parents, and healthcare professionals (HCPs) involved in their care. *Methods:* Workpackage one (WP1) will use qualitative methods to explore and understand the barriers and facilitators to PA in CCSs. Two sets of semi-structured interviews will be conducted with (i) CCSs (aged 10 -24 years) and (ii) parents of CCSs. Workpackage two (WP2) will use co-design methods to bring together stakeholders (CCSs; their parents; HCPs; researchers) to develop a prototype intervention. Where possible, all data will be audio-recorded and transcribed. *Analysis:* Data from WP1 will be analysed using a thematic approach. Analysis of WP2 data will involve content analysis, and analysis of formative output and procedures.

### Ethics and dissemination:

The study was approved by North East - Tyne & Wear South Research Ethics Committee (REC ref: 18/NE/0274). Research findings will be disseminated primarily via national and international conferences and publication in peer-reviewed journals. Patient and public involvement (PPI) will inform further dissemination activities.

## ARTICLE SUMMARY

### Strengths and limitations of this study

- The BEACON study will provide in-depth knowledge on the barriers and facilitators to PA in CCSs.
- The use of recognised frameworks of intervention development and principles from behavioural science to systematically develop an evidence- and theory-based health behaviour change intervention is a significant strength.
- Intervention development will actively engage stakeholders (CCSs, parents and healthcare professionals), ensuring that the resulting intervention is co-produced with those it aims to support, and maximizing likely acceptability and feasibility.
- Strategies will mitigate against potential sources of bias and challenges in recruitment. COVID-19 guidelines at the time of study, as well as participant preference, will dictate the

1  
2  
3 modes of participation. As such we offer multiple ways in which individuals may contribute  
4 to the study and recognise the potential limitations of conducting co-design work remotely.  
5

- 6 • The prototype intervention developed will be ready to be taken forward into production and  
7 testing.  
8  
9

## 10 11 INTRODUCTION

12  
13 As a result of treatment advances, the population of childhood cancer survivors (CCSs) has rapidly  
14 grown. In the UK alone, there are more than 40,000 CCSs,<sup>1</sup> whilst across Europe there may be up to  
15 500,000.<sup>2</sup> Two-thirds of CCSs may develop chronic health conditions by 15-25 years post-diagnosis.<sup>3</sup>  
16 In particular, those treated with cardiotoxic therapies can experience persistent and cumulative  
17 damage to their cardiovascular, pulmonary and metabolic systems.<sup>4</sup> Cardiovascular complications  
18 are a leading cause of morbidity among CCSs, and British CCSs have a 3.4-fold excess risk of cardiac  
19 death.<sup>5</sup> Development of these chronic conditions impacts adversely not only on the survivors'  
20 physical health, but also on their psychological health and wellbeing and incurs costs for the  
21 healthcare system.  
22  
23

24  
25 In the general population, it is well recognised that poor cardiovascular outcomes are strongly  
26 related to modifiable health behaviours, including a lack of physical activity (PA).<sup>6</sup> Similarly, low  
27 levels of PA in even young CCSs (<18 years), have been linked to a worse cardiovascular risk profile,<sup>7</sup>  
28 and CCSs are often less active than controls without a history of cancer.<sup>8</sup> However, amongst long-  
29 term survivors of childhood lymphoma, a higher levels of vigorous PA is associated with a 50% lower  
30 risk of any cardiovascular event.<sup>9</sup> Moreover, a Cochrane review indicated that physical exercise  
31 training programmes may improve physical fitness, body composition and cardiorespiratory fitness  
32 in childhood cancer patients and survivors.<sup>10</sup> Considered together, this evidence provides a strong  
33 rationale for developing effective interventions to increase PA in CCSs.  
34  
35

36  
37 Reviews have concluded that interventions to increase PA levels among CCSs are feasible and safe.  
38 However, studies are heterogeneous and most are methodologically limited.<sup>11 12</sup> In addition, there is  
39 little evidence that interventions have been systematically developed using recognised frameworks  
40 of intervention development.<sup>13</sup> Critically, while an understanding of factors which may promote or  
41 inhibit the target health behaviour (here, PA) is an essential first step in intervention design,<sup>14-17</sup>  
42 most interventions appear to have been developed without having undertaken formative work to  
43 gain this understanding. Indeed, currently, little is known about determinants of PA behaviours in  
44 CCSs. Additionally, although the application of appropriate theory is recognised in behavioural  
45 science as an essential element of behaviour change interventions,<sup>14-17</sup> most interventions appear to  
46 have no robust theoretical underpinnings.  
47  
48

49  
50 Leading authorities advocate active stakeholder involvement in the design and development of  
51 novel health interventions,<sup>14-17</sup>; this is essential to understanding the perspectives and psychosocial  
52 context of users.<sup>18</sup> However, most interventions for CCSs have been developed without the  
53 involvement of CCSs, raising concerns about the relevance and acceptability of the interventions to  
54 survivors. Moreover, although parents are key agents in their children's PA behaviour,<sup>19 20</sup> there has  
55 been little attempt to understand either: (i) how the beliefs of parents of CCSs might influence their  
56 child's PA behaviours, or (ii) how parental support may be harnessed to encourage PA in CCSs.  
57

58  
59 A further consideration is wider implementation of interventions among CCSs. Those developed thus  
60 far were not designed to be deliverable within the context of the UK National Health Service (NHS).

1  
2  
3 More generally, there is a lack of research exploring how support to modify health behaviours  
4 (including PA) among CCSs can be implemented effectively and feasibly in follow-up care.  
5 Involvement of HCPs and other relevant stakeholders in the development process would increase  
6 the likelihood that an intervention will be feasible, acceptable and implementable in the current  
7 healthcare pathway for CCSs; this does not appear to have been widely done.  
8  
9

10 This project seeks to comprehensively investigate barriers and enablers to PA among CCSs – from  
11 the CCSs, parental and wider stakeholder perspective. Using the knowledge gained, and with the  
12 support of key stakeholders, we will develop a person-centred evidence- and theory-based  
13 prototype intervention aimed at promoting and supporting sustainable PA behaviour change in  
14 CCSs.  
15  
16

## 17 18 **AIMS AND OBJECTIVES**

### 19 20 **Aim**

21  
22 The ultimate goal of the BEACON project is to develop an intervention which can reduce  
23 cardiometabolic risk markers in the medium-term, and reduce cardiovascular morbidity and  
24 mortality in the long-term, whilst also helping to prevent a deterioration in patient well-being and  
25 health-related quality of life due to poor cardiovascular health.  
26  
27

### 28 29 **Objectives**

30 The objectives of this phase of the BEACON project are to:

- 31 1) explore CCSs' experiences of, and participation in, PA behaviours.
- 32 2) identify and explore the barriers and enablers of PA behaviours in CCSs.
- 33 3) explore CCSs' and parents' experiences of receiving advice on PA or exercise, and perceived  
34 need for this information.
- 35 4) actively engage key stakeholders (CCSs, their parents, HCPs) in a co-design process to  
36 develop a prototype intervention.  
37  
38  
39  
40  
41  
42

## 43 44 **METHODS AND ANALYSIS**

### 45 46 **Study design**

47 The study will be informed by intervention development approaches - notably the Medical Research  
48 Council framework of intervention development<sup>15</sup> and the Person-Based Approach<sup>18</sup> to ensure that  
49 the resulting intervention is systematically developed from the bottom-up and: 1) is theory- and  
50 evidence-based;<sup>14 15 17 21-23</sup> 2) prioritises and incorporates the views of the people who will use the  
51 intervention;<sup>18 24</sup> and 3) is likely to be implementable and scalable in the NHS.<sup>25 26</sup> The current phase  
52 of the project is focused on the intervention development. The planned research activities (which  
53 form two sequential workpackages), and the other formative work previously undertaken by the  
54 study team which will feed into intervention development, are summarized in Table 1 and Figure 1.  
55 Workpackage 1 (WP1) will generate evidence on determinants of PA among CCSs. Workpackage 2  
56 (WP2) will involve a co-design process to produce a prototype intervention.  
57  
58  
59  
60

## Participants

WP1 involves CCSs and parents/guardians of CCSs; eligibility criteria are shown in Table 2. Participants will be recruited via two clinical sites which are both specialist centres in childhood cancer treatment.

WP2 will recruit CCSs, parents/guardians of CCSs and HCPs. The same inclusion and exclusion criteria as for WP1 will apply for CCSs and parents/guardians. HCPs will be eligible if they are involved in the follow-up care of CCSs. Academics and researchers with relevant expertise will also be eligible.

## Sampling

### WP1: Generating evidence on determinants of PA among CCSs

Potential participants will be selected using purposive sampling with strata comprising of: age (for CCSs - current age of 10-15/16-24 years; for parents/guardians - age of child at diagnosis:  $\leq 10$ ; 11-18 years); clinical site); and cancer site (haematological malignancy/solid tumour/central nervous system tumour). Diversity in other characteristics (e.g. gender, treatment, time since diagnosis) will be sought to ensure sample heterogeneity and elicitation of a broad range of views and experiences.

Recruitment will continue until data saturation is reached in each interview set, defined as no new themes arising in the last three interviews.<sup>27</sup> We estimate that, interviews with 25-30 CCSs and 25-30 parents/guardians will provide adequate data. CCSs may participate without their parent/guardian taking part, and vice versa.

### WP2: Co-design process

Up to 40 CCSs, parents/guardians of survivors, HCPs and academics/researchers will take part in the co-design process. At least 20 participants will be CCSs (due to the nature of the activities, participation is deemed only to be suitable for CCSs aged 16 and above) and 10 will be parents/guardians. As with the interviews, it will be important to seek diversity in the participants.

HCPs invited to take part in WP2 will include consultant oncologists and nurse specialists from paediatric and teenage and young adult services and other relevant HCPs (e.g. occupational therapists, physiotherapists, psychologists, cardiologists). The aim is that at least six HCPs will participate in the co-design process. Academics/researchers with expertise in the following fields will also participate: behavioural science, health psychology, PA and exercise science, healthcare technologies and human-centred design, and childhood cancer survivorship.

## Identification, screening and recruitment of sample

Identification and screening of CCSs began in February 2019 with recruitment expected to end December 2020.

### WP1: Generating evidence on determinants of PA among CCSs

Employing multiple recruitment strategies can guard against recruitment problems,<sup>28</sup> therefore, we will use up to three methods for recruiting participants. The primary method will require consultant oncologists/nurse specialists to screen attendance lists of forthcoming CCSs follow-up clinics at

1  
2  
3 collaborating sites. At the clinic, eligible CCSs and their parents/guardians will be informed of the  
4 study by their child's oncologist/nurse specialist and asked if they would like to meet the researcher  
5 (MB). If so, the researcher (MB) will provide further details including the study information sheet  
6 and answer any questions. Potentially interested CCSs and parents/guardians will be asked whether  
7 the researcher can contact them in a few days to find out whether they would like to participate.  
8 Meeting the researcher at clinic will help potential participants feel more at ease and aid the  
9 establishment of rapport, which may be particularly important for younger patients.<sup>29</sup>  
10  
11

12 Approvals are in place for variants of this process in the event that the researcher cannot attend the  
13 clinic, or the clinic is too busy for collaborating clinical colleagues to approach eligible CCSs and  
14 parents/guardians individually. These include (1) clinical colleagues recording details of those  
15 potentially interested of behalf of the researcher, who will follow-up by phone and (2) provision of  
16 study packs (containing a reply slip) to eligible CCSs and parents/guardians at clinic check-in with  
17 those interested returning the reply slip in a sealed envelope to the receptionist to forward to the  
18 researcher.  
19  
20

21 The second method will involve consultant oncologists/nurse specialists at the two sites screening  
22 patients in their care for eligibility and mailing a study information sheet; follow-up telephone calls  
23 by the clinical colleagues are permitted. Interested CCSs and parents/guardian may contact the  
24 researcher directly.  
25  
26

27 The third method, if required, will be identification of survivors via cancer registries in the study  
28 areas: the Northern Region Young Person's Malignant Disease Registry (NRYPMDR) and the  
29 Yorkshire Specialist Register of Cancer in Children and Young People (YSRCCYP).  
30

31 Information sheets for CCSs are developmentally appropriate and designed for ages 10-12, 13-15  
32 and ≥16 years. CCSs aged 10-15 years will also receive a copy of the Charter of Rights for Children  
33 and Young People in Research.<sup>30</sup> Parents of CCSs aged 10-15 years will receive an information sheet  
34 explaining the study their child has been invited to participate in.  
35  
36  
37  
38

### 39 WP2: Co-design process

40 WP1 participants will be asked if they wish to be notified of/invited to the co-design activities. New  
41 participants, without experience of the study, will also be recruited. Methods for recruiting CCSs and  
42 their parents/guardians will mirror those of WP1. In addition, we will also seek to recruit via social  
43 media, support groups and charities. Posts advertising the study will ask for interested individuals to  
44 contact the researcher who will assess eligibility and provide further information.  
45  
46

47 Eligible HCPs working at the collaborating sites will be invited to take part. We will also promote the  
48 study via social media, and through networks of the Childhood Cancer & Leukaemia Group, to  
49 encourage participation of HCPs from across UK. Academics and researchers experienced in relevant  
50 areas (also previously stated) will also be asked to participate.  
51  
52  
53  
54  
55

### 56 **Data collection**

#### 57 WP1: Generating evidence on determinants of PA among CCSs

58  
59  
60

1  
2  
3 Interviews with CCSs aged 10-15 years will take place face-to-face at the interviewee's and their  
4 parents preferred location (e.g. university/home). A parent/guardian may be present if they or the  
5 child wishes. These interviews are expected to last 30-60 minutes, but length will be determined by  
6 the child.  
7

8 Interviews with CCSs aged  $\geq 16$  years, and those with parents/guardians, will take place by  
9 telephone, an end-to-end encrypted web app which enables secure audio/video calls (e.g.  
10 WhatsApp, Zoom), or face-to-face at a location of their choosing; providing choice on ways to  
11 participate can help maximise recruitment.<sup>28</sup> Experience suggests these interview will last 60-90  
12 minutes<sup>31</sup>, but may be longer if the interviewee wishes.  
13  
14

15 Before the interview commences, the researcher will seek informed consent; for those aged 10-15  
16 years, a parent/guardian will provide consent and the interviewee assent to ensure that the child  
17 feels involved in the decision about their participation.<sup>32</sup> Participants (and parents on behalf of  
18 children aged 10-15 years) will be asked to complete a short demographic questionnaire. Time will  
19 be spent developing rapport and creating a secure, trusting environment,<sup>28</sup> particularly with younger  
20 children.<sup>29</sup>  
21  
22

23 The interviews will be guided by a topic guide, which will be informed by the Theoretical Domains  
24 Framework (TDF), an integrative framework of behaviour change theories,<sup>21 22</sup> and will cover:  
25 participant's views and attitudes towards their own/their child's PA; difficulties experienced with,  
26 and barriers to, PA; whether support/advice has been given regarding PA; and what helps or would  
27 help the survivor to be more active. Questions will be open and neutral. Topic guides will be used  
28 flexibly to allow interviewees to raise issues they consider important to the topic (PA); if this results  
29 in new areas, these will be explored in subsequent interviews to ensure sufficient depth is reached.  
30  
31

32 Interview content will be developmentally appropriate. Interviews with children aged 10-15 years  
33 will utilise cue cards and images to help engage and focus the participant and provide them with  
34 some control over the order of the questions.<sup>29</sup> With the interviewees' permission, interviews will be  
35 audio-recorded; if permission for recording is not granted, the researcher will take detailed notes.  
36  
37  
38  
39

#### 40 WP2: Co-design process

41 We will follow the sequential and systematic co-design approach to integrate scientific evidence,  
42 expert knowledge and experience, and stakeholder involvement to design a prototype  
43 intervention.<sup>24</sup> The two phases of WP2 are described below.  
44  
45  
46  
47

##### 48 *Phase 1: Behavioural analysis*

49 The researcher team will combine WP1 findings and other formative work previously conducted  
50 (e.g. a systematic review) (Figure 1), into a "theoretical model" of PA engagement among CCSs. They  
51 will identify which influences on PA are potentially modifiable to determine what needs to be done  
52 to change behaviours. The Behaviour Change Wheel will be used to map the TDF domains, and  
53 organise these into a working theoretical model of PA in CCSs.<sup>23</sup> For each identified factor the team  
54 will identify which intervention functions might be effective in changing PA behaviours. For each of  
55 the relevant intervention functions, associated behavioural change techniques will be identified (i.e.  
56 the techniques that can be used to overcome barriers to, and enhance enablers of, engagement with  
57 PA).<sup>33</sup>  
58  
59  
60



## Phase 2: Co-design process

This process will involve a range of methods in order to engage and collaborate with stakeholders flexibly. Due to the current global COVID-19 pandemic, we will offer multiple modes of participation including workshops (face-to-face or online), interviews (one-to-one or small groups of 2/3 people; face-to-face or online); and online collaborative groups. The mode of participation will be guided by participant preference, as well as COVID-19 guidelines at the time of study.

Face-to-face workshops are expected to last 3-4 hours, while those online will be shorter (1-2 hours). Interviews are likely to also last 1-2 hours. Video-conferencing is an acceptable method for discussion with young people and an optimal alternative to face-to-face groups; it also enables people from various geographical location to attend.<sup>34</sup>

Online collaborative groups allow stakeholders to engage with the development process, and one another, both in real time and asynchronously. Secure groups will be set up via WhatsApp, Facebook or an Ideaboard.co.uk website developed specifically for the study. WhatsApp and Facebook are widely used and familiar applications, and have successfully been used for co-design<sup>35 36</sup>; Ideaboard offers greater flexibility. Preferences of potential participants will inform the choice of platform. The team will post content to the groups (e.g. videos, images, questions) and invite feedback.

Following PPI input, CCSs will have the choice to participate in a survivor only or mixed (survivors plus parents/HCPs) workshop/small group interview/collaborative group.

Using these methods, a range of activities (e.g. think aloud, mapping, brainstorming, storyboarding) will be used to engage participants, provide ways for them to share, envision and develop their ideas with others and to facilitate interaction. The specific activities will be dictated by the findings of WP1, and the findings of any preceding workshops.

Two steps in the co-design process are envisioned (Figure 1). In the first step, evidence statements on PA among CCSs will be presented. Stakeholders' views on the relevance, importance and effectiveness will be sought. Activities will be used to generate insights into what is needed to improve PA levels in CCSs and novel intervention ideas which stakeholders think could be effective and acceptable in improving PA in CCSs. Ideas will also be sought for how an intervention should be designed, where and how it should be implemented, and the relevant components. Mapping activities will enable organisation and visualisation of resulting intervention ideas and their key components. The research team will analyse information collected to develop 'intervention principles', ensuring that the evidence and theory, which is central to the success of the intervention, remains intact.<sup>37</sup>

During the second stage activities will focus on gaining user feedback on intervention principles. Content and mode of delivery will be further developed and refined. Intervention tailoring will also be considered. Participants will identify and discuss potential challenges around acceptability, usability and feasibility from different perspectives (e.g. CCSs, parents, HCPs, commissioners, service providers). Based on participants discussion and decisions, designers/creative facilitators will begin to sketch paper-based 'mock-ups' of the intervention.

Outputs will be critically evaluated and translated into a design brief which details the aims of the intervention, the design features it will include, and how these will be operationalised, taking care will to ensure alignment with evidence and theory. A logic model will be developed,<sup>14</sup> providing a graphical/textual representation of how the intervention is intended to work, linking outcomes with

1  
2  
3 processes, the underlying theoretical assumptions and active ingredients (or the behaviour change  
4 methods and techniques that will be used to target the identified processes/mechanism associated  
5 with behaviour and behaviour change).<sup>33,38</sup> The outcome will be a mock-up of the prototype which  
6 will represent the main features of the intervention. This prototype will be ready to take into  
7 production and undergo refinement and optimisation before going forward into further testing in a  
8 future study.  
9

10  
11 Prior to participation in co-design activities, informed consent will be sought and a ground rules for  
12 communication and engagement established. The researchers will ensure an atmosphere which is  
13 welcoming and non-judgemental and will be clear that all participants are treated as equals whether  
14 they are young people, parents, researchers or HCPs.  
15

16 Where possible, co-design activities will be audio or video recorded and transcribed. Other data  
17 collected will include written data/notes, mapping activities and sketches resulting from the various  
18 activities (e.g. group work, brainstorm) and written comments generated by the online collaborative  
19 groups.  
20  
21

## 22 23 24 **Data analysis plan**

### 25 WP1: Generating evidence on determinants of PA among CCSs

26 Interview recordings will be transcribed verbatim. Analysis will occur in parallel with data collection  
27 to ensure that any new issues raised are explored in subsequent interviews. Interviews from CCSs  
28 and parents/guardians will be analysed separately. To identify views and experiences of, and  
29 barriers and facilitators to, PA in CCSs an inductive thematic analysis will be conducted.<sup>39</sup> Two team  
30 members will code data from preliminary interviews and discuss and agree the emerging codes and  
31 potential themes. Codes relating to the barriers and facilitators to PA will be mapped onto the TDF.<sup>21</sup>  
32  
33  
34  
35  
36  
37  
38  
39  
40  
41  
42  
43  
44  
45  
46  
47  
48  
49  
50  
51  
52  
53  
54  
55  
56  
57  
58  
59  
60  
22 These codes will then be applied by the researcher to remaining interviews, incorporating any new  
23 codes and themes as they are identified. For analytical rigour, the classification of belief statements  
24 to the TDF domains will be discussed and agreed within the team. Coding and analysis will be  
25 facilitated by QSR International's NVivo software (Version 12, 2018).

### 26 WP2: Co-design activities

27 Analysis of co-design activities will be focused specifically on the aims of each activity, pragmatic and  
28 expeditious so findings can be fed into subsequent stages.<sup>37</sup> Qualitative content analysis will be  
29 performed using QSR International's NVivo software (Version 12, 2018), supplemented by other  
30 forms of analysis as required.  
31  
32  
33  
34  
35  
36  
37  
38  
39  
40  
41  
42  
43  
44  
45  
46  
47  
48  
49  
50  
51  
52  
53  
54  
55  
56  
57  
58  
59  
60

## 51 **Ethics and dissemination**

52 A favourable opinion has been granted from the North East - Tyne & Wear South Research Ethics  
53 Committee (REC ref: 18/NE/0274).  
54  
55

56 Informed consent will be sought prior to participation. Participants will be informed that  
57 participation is entirely voluntary, and they may withdraw at any point, without giving a reason and  
58 without negative consequences. They will be asked for their agreement to audio/video record  
59 (where relevant) and informed that recordings are confidential, and transcriptions of audio-  
60



1  
2  
3 recordings will be anonymised. Ethical considerations relating to the interviewing of children (aged  
4 under 16 years) are described above. Interview participants will be offered payment of any travel  
5 expenses and a £20 high-street shopping voucher. This amount is based on the need to provide  
6 some compensation for the participant's time, expertise and contribution to the research but  
7 without coercing individuals to take part when they would rather not.<sup>40</sup> Participants will be notified  
8 of the voucher in the study information sheet and will be offered the voucher at the beginning of the  
9 interview to convey to them that they are being rewarded for their attendance, and not for what  
10 they share during the interview.<sup>41</sup> Participants recruited to co-design activities will receive a high  
11 street voucher which reflects the time commitment and nature of the activity they choose to  
12 participate in, in accordance with INVOLVE guidance.<sup>42</sup>

13  
14 Findings will be disseminated via our study website (<https://research.ncl.ac.uk/beingactive/>),  
15 conferences and journal publication. A summary of research findings will be available for  
16 participants. PPI will inform further dissemination activities (e.g. via patient organisations, social  
17 media), appropriate formats (e.g. infographics, video) and content to ensure lay summaries are  
18 understandable and engaging to survivors.

### 21 22 23 24 **Patient and public involvement and project steering group**

25  
26 Feedback on the study concept and methods were gained from two established PPI groups in  
27 Newcastle: the Young Person's Advisory Group – North England (YPAG-NE) whose members are  
28 young people aged 13-18 years old, and the Perspectives in Cancer Research group whose members  
29 are survivors of adult cancer. Views of young adult CCSs were gained via representatives of two  
30 European cancer organisations, PanCare (Pan-European Network for Care of Survivors after  
31 Childhood and Adolescent Cancer) and Youth Cancer Europe, and a survey posted to a closed  
32 Facebook group for survivors of cancer. YPAG-NE and two adult CCSs provided comments on patient  
33 information and interview topic guides/cue cards. Patient representatives (OB & JH) sit on the  
34 project steering group, and will be involved in data interpretation, co-design activities, and advising  
35 on dissemination.

### 36 37 38 39 40 **DISCUSSION**

41  
42 A high proportion of adolescents and young adults do not meet recommended levels of PA,<sup>43</sup> and  
43 there are already many publicly available programmes and interventions to encourage PA, including  
44 government/health service initiatives and apps.<sup>44-46</sup> This raises the question of whether a specific PA  
45 intervention is needed for CCSs. While there is considerable overlap between determinants of PA in  
46 CCSs and young people without cancer, many influences are likely specific to CCSs (e.g. cancer-  
47 related fatigue, frustration about impact of cancer).<sup>13</sup> There are also concerns about the quality and  
48 likely effectiveness of many of the publicly-available PA programmes.<sup>46</sup> In addition, cancer survivors  
49 may question the relevance of general (i.e. non-cancer specific) PA programmes to them,<sup>47</sup> and  
50 there is evidence that tailoring interventions to a specific target population is likely to increase  
51 effectiveness.<sup>48</sup> Taken together, this suggests that the route most likely to lead to changes in CCSs'  
52 PA levels is to develop an intervention specifically for this group.

53  
54 The strength of our study lies in the adoption of an evidence-based, person-centred approach.  
55 However, we also recognise the need to mitigate potential study limitations. To minimise selection  
56 bias, the importance of giving all eligible patients the opportunity to hear about the study, and  
57 allowing them make their own choice as to whether they want to participate or not, will be  
58  
59  
60

1  
2  
3 highlighted to those involved in the screening process.<sup>49</sup> For example, participating in this research  
4 may appeal more to CCSs who are physically active, than to those who are not. Therefore, patients  
5 will also be made aware that a judgement will not be made on their current activity levels and that  
6 we are interested in their views regardless of whether they consider themselves to be active or not.  
7 CCSs can be challenging to recruit to research,<sup>50</sup> therefore, we propose several routes by which CCSs  
8 may be made aware of the study. This will help to safeguard against any potential recruitment issues  
9 and will also ensure that a wide range of individuals are offered the opportunity to participate. We  
10 also acknowledge the potential impact of the current COVID-19 pandemic on the study, including  
11 the possible need to conduct co-design activities remotely. The use of video-conferencing could  
12 exclude those who have limited access to the required technology, or those who do not feel  
13 comfortable using it.<sup>51</sup> The use of remote methods may also hinder the interactive, creative and  
14 collaborative process essential to co-design. Therefore, we have proposed several ways that  
15 individuals can take part in co-design activities, including online synchronous and asynchronous  
16 methods. Careful and considered planning will be needed to adapt co-design activities to ensure  
17 participation and engagement, as well as an online environment in which individuals feel safe and  
18 able to contribute.

19  
20  
21  
22 The final output from this phase of the BEACON study will be a prototype evidence-based and  
23 theoretically-informed intervention. The next step will be to fully operationalise the intervention and  
24 any supporting materials (e.g. training manual). Efficient and systematic user pre-testing studies will  
25 be conducted to provide insight into different aspects of the intervention and iteratively refine and  
26 optimise it.<sup>37</sup> Subsequently, as recommended in the area of PA research,<sup>52</sup> we plan to assess  
27 feasibility and acceptability to users and, following that, evaluate effectiveness and cost-  
28 effectiveness in a randomised controlled trial, with a parallel process evaluation.<sup>53</sup>

29  
30  
31 Various organisations, including the American Cancer Society<sup>54</sup> and Macmillan Cancer Support,<sup>55</sup>  
32 have produced PA recommendations for cancer survivors (of all ages). However, understanding  
33 remains limited on how best to support survivors to improve levels of PA and maintain changes.<sup>56 57</sup>  
34 The study described here – although it focuses on CCSs – provides an example of how to use a  
35 behavioural science approach to develop a person-centred, evidence-based and theoretically-  
36 informed PA intervention and, therefore, may be informative for those interested in systematically  
37 developing PA interventions for other survivor groups.

#### 38 39 40 41 **Author contributions**

42 MB, LS, RS and VAS conceived the study. MB, LS, RS, VAS, NS and AG developed the grant proposal  
43 and secured funding. MB managed the ethical and research approvals and will undertake the field  
44 work and data analysis supported primarily by LS and VAS. RS, AG and NS will support recruitment of  
45 participants. JH & OB have, and will continue to, provide PPI input. JS and KM will provide specialist  
46 advice and expertise throughout the study. MB drafted the manuscript, and AG, JS, LS, RS, KM, NS,  
47 VAS provided revisions and comments. All authors approved the final manuscript.

48  
49  
50 **Funding statement:** This work is supported by Children's Cancer and Leukaemia Group grant  
51 number CCLGA 2017 26, the North of England Children's Cancer Research Fund and the Children's  
52 Cancer Fund.

53  
54  
55  
56  
57 **Competing interests statement:** No interests to declare.  
58  
59  
60

1  
2  
3 **Figure 1:** Overview of planned research for the BEACON project  
4

5 **Table 1:** Domains, actions and planned methods to develop physical activity intervention for  
6 childhood cancer survivors  
7

8 **Table 2:** Childhood cancer survivors' inclusion and exclusion criteria  
9  
10  
11  
12  
13  
14  
15  
16  
17  
18  
19  
20  
21  
22  
23  
24  
25  
26  
27  
28  
29  
30  
31  
32  
33  
34  
35  
36  
37  
38  
39  
40  
41  
42  
43  
44  
45  
46  
47  
48  
49  
50  
51  
52  
53  
54  
55  
56  
57  
58  
59  
60

For peer review only

## REFERENCES

1. Children's Cancer and Leukaemia Group. Contact 2016 [Available from: <https://www.cclg.org.uk/Resource-Collection?id=6705c96b-61c6-421d-9219-769cf9606b28>].
2. Haupt R, Essiaf S, Dellacasa C, et al. The 'Survivorship Passport' for childhood cancer survivors. *Eur J Cancer* 2018;102:69-81. doi: <https://doi.org/10.1016/j.ejca.2018.07.006>
3. Oeffinger KC, Mertens AC, Sklar CA, et al. Chronic Health Conditions in Adult Survivors of Childhood Cancer. *N Engl J Med* 2006;355(15):1572-82. doi: 10.1056/NEJMsa060185
4. Lipshultz SE, Adams MJ, Colan SD, et al. Long-term cardiovascular toxicity in children, adolescents, and young adults who receive cancer therapy: pathophysiology, course, monitoring, management, prevention, and research directions: a scientific statement from the American Heart Association. *Circulation* 2013;128(17):1927-95. doi: 10.1161/CIR.0b013e3182a88099
5. Fidler MM, Reulen RC, Henson K, et al. Population-Based Long-Term Cardiac-Specific Mortality Among 34 489 Five-Year Survivors of Childhood Cancer in Great Britain. *Circulation* 2017;135(10):951-63. doi: 10.1161/CIRCULATIONAHA.116.024811
6. World Heart Foundation. Risk factors 2020 [Available from: <https://www.world-heart-federation.org/resources/risk-factors/> accessed 06/03/2020].
7. Slater ME, Steinberger J, Ross JA, et al. Physical Activity, Fitness, and Cardiometabolic Risk Factors in Adult Survivors of Childhood Cancer with a History of Hematopoietic Cell Transplantation. *Biol Blood Marrow Transplant* 2015;21(7):1278-83. doi: 10.1016/j.bbmt.2015.04.007
8. Zhang FF, Saltzman E, Must A, et al. Do Childhood Cancer Survivors Meet the Diet and Physical Activity Guidelines? A Review of Guidelines and Literature. *Int J Child Health Nutr* 2012;1(1):44-58. doi: 10.6000/1929-4247.2012.01.01.06 [published Online First: 2012/01/01]
9. Jones LW, Liu Q, Armstrong GT, et al. Exercise and risk of major cardiovascular events in adult survivors of childhood hodgkin lymphoma: a report from the childhood cancer survivor study. *J Clin Oncol* 2014;32(32):3643-50. doi: 10.1200/JCO.2014.56.7511
10. Braam KI, van der Torre P, Takken T, et al. Physical exercise training interventions for children and young adults during and after treatment for childhood cancer. *Cochrane Database Syst Rev* 2016(3) doi: 10.1002/14651858.CD008796.pub3
11. Pugh G, Gravestock HL, Hough RE, et al. Health Behavior Change Interventions for Teenage and Young Adult Cancer Survivors: A Systematic Review. *J Adolesc Young Adult Oncol* 2016;5(2):91-105. doi: 10.1089/jayao.2015.0042
12. Kopp LM, Gastelum Z, Guerrero CH, et al. Lifestyle behavior interventions delivered using technology in childhood, adolescent, and young adult cancer survivors: A systematic review. *Pediatr Blood Cancer* 2017;64(1):13-17. doi: 10.1002/pbc.26166
13. Brown MC SL, Skinner R, Sneihotta FF, Araujo-Soares A. The development of health behaviour change interventions for childhood cancer survivors: the need for a behavioural science approach. *Pediatr Blood Cancer* 2020;Manuscript submitted for publication
14. Bartholomew Eldredge LK, Markham, C. M., Ruiters, R. A. C., Fernandez, M. E., Kok, G., & Parcel, G. S. . Planning health promotion programs: An intervention mapping approach 4th ed. San Francisco, CA: Jossey-Bass. 2016.
15. Craig P, Dieppe P, Macintyre S, et al. Developing and evaluating complex interventions: the new Medical Research Council guidance. *BMJ* 2008;337 doi: 10.1136/bmj.a1655
16. O'Cathain A, Croot L, Sworn K, et al. Taxonomy of approaches to developing interventions to improve health: a systematic methods overview. *Pilot Feasibility Stud* 2019;5:41. doi: 10.1186/s40814-019-0425-6 [published Online First: 2019/03/30]
17. O'Cathain A, Croot L, Duncan E, et al. Guidance on how to develop complex interventions to improve health and healthcare. *BMJ Open* 2019;9(8):e029954. doi: 10.1136/bmjopen-2019-029954 [published Online First: 2019/08/20]

18. Yardley L, Morrison L, Bradbury K, et al. The person-based approach to intervention development: application to digital health-related behavior change interventions. *J Med Internet Res* 2015;17(1):e30. doi: 10.2196/jmir.4055
19. Martins J, Marques A, Sarmiento H, et al. Adolescents' perspectives on the barriers and facilitators of physical activity: a systematic review of qualitative studies. *Health Educ Res* 2015;30(5):742-55. doi: 10.1093/her/cyv042 [published Online First: 2015/09/02]
20. Brunton G, Thomas J, Harden A, et al. Promoting physical activity amongst children outside of physical education classes: A systematic review integrating intervention studies and qualitative studies. *Health Educ J* 2005;64(4):323-38. doi: 10.1177/001789690506400404
21. Michie S, Johnston M, Abraham C, et al. Making psychological theory useful for implementing evidence based practice: a consensus approach. *Qual Saf Health Care* 2005;14 doi: 10.1136/qshc.2004.011155
22. Cane J, O'Connor D, Michie S. Validation of the theoretical domains framework for use in behaviour change and implementation research. *Implement Sci* 2012;7(1):37. doi: 10.1186/1748-5908-7-37
23. Michie S, van Stralen M, West R. The Behaviour Change Wheel: a new method for characterising and designing behaviour change interventions. *Implement Sci* 2011;6 doi: 10.1186/1748-5908-6-42
24. O'Brien N, Heaven B, Teal G, et al. Integrating Evidence From Systematic Reviews, Qualitative Research, and Expert Knowledge Using Co-Design Techniques to Develop a Web-Based Intervention for People in the Retirement Transition. *J Med Internet Res* 2016;18(8):e210. doi: 10.2196/jmir.5790
25. Murray E, Treweek S, Pope C, et al. Normalisation process theory: a framework for developing, evaluating and implementing complex interventions. *BMC Med* 2010;8(1):63. doi: 10.1186/1741-7015-8-63
26. Glasgow RE, Vogt TM, Boles SM. Evaluating the public health impact of health promotion interventions: the RE-AIM framework. *Am J Public Health* 1999;89(9):1322-7. doi: 10.2105/ajph.89.9.1322 [published Online First: 1999/09/04]
27. Francis JJ, Johnston M, Robertson C, et al. What is an adequate sample size? Operationalising data saturation for theory-based interview studies. *Psychol Health* 2010;25(10):1229-45. doi: 10.1080/08870440903194015 [published Online First: 2010/03/06]
28. Bamidele OO, H EM, Lagan BM, et al. "Hard to reach, but not out of reach": Barriers and facilitators to recruiting Black African and Black Caribbean men with prostate cancer and their partners into qualitative research. *Eur J Cancer Care (Engl)* 2019;28(2):e12977. doi: 10.1111/ecc.12977 [published Online First: 2018/12/15]
29. Fargas-Malet M, McSherry D, Larkin E, et al. research with children: methodological issues and innovative techniques. *J Early Child Res* 2010;8(2):175-92. doi: 10.1177/1476718x09345412
30. Institute of Child Protection Studies. A Charter of Rights for Children and Young People [poster]. 2016.
31. Brown MC, Pearce MS, Bailey S, et al. The long-term psychosocial impact of cancer: the views of young adult survivors of childhood cancer. *Eur J Cancer Care (Engl)* 2016;25(3):428-39. doi: 10.1111/ecc.12380
32. Nuffield Council on Bioethics. Children and clinical research: ethical issues, 2015.
33. Michie S, Ashford S, Sniehotta FF, et al. A refined taxonomy of behaviour change techniques to help people change their physical activity and healthy eating behaviours: the CALO-RE taxonomy. *Psychol Health* 2011;26(11):1479-98. doi: 10.1080/08870446.2010.540664
34. Han J, Torok M, Gale N, et al. Use of Web Conferencing Technology for Conducting Online Focus Groups Among Young People With Lived Experience of Suicidal Thoughts: Mixed Methods Research. *JMIR Ment Health* 2019;6(10):e14191. doi: 10.2196/14191 [published Online First: 2019/10/08]



- 1
- 2
- 3
- 4 35. Leapfrog. Be Included: reflecting on the use of social media for co-designing 2020 [Available
- 5 from: <http://leapfrog.tools/blog/be-included-reflecting-on-the-use-of-social-media-for-co->
- 6 [designing/](http://leapfrog.tools/blog/be-included-reflecting-on-the-use-of-social-media-for-co-) accessed 11/04/2020.
- 7
- 8 36. Thrul J, Belohlavek A, Hambrick DA, et al. Conducting online focus groups on Facebook to inform
- 9 health behavior change interventions: Two case studies and lessons learned. *Internet*
- 10 *Interventions* 2017;9:106-11. doi: <https://doi.org/10.1016/j.invent.2017.07.005>
- 11
- 12 37. Bradbury K, Morton K, Band R, et al. Using the Person-Based Approach to optimise a digital
- 13 intervention for the management of hypertension. *PLoS One* 2018;13(5):e0196868. doi:
- 14 10.1371/journal.pone.0196868 [published Online First: 2018/05/04]
- 15
- 16 38. Kok G, Gottlieb NH, Peters GJ, et al. A taxonomy of behaviour change methods: an Intervention
- 17 Mapping approach. *Health Psychol Rev* 2016;10(3):297-312. doi:
- 18 10.1080/17437199.2015.1077155 [published Online First: 2015/08/12]
- 19
- 20 39. Braun V CV. Successful qualitative research: a practical guide for beginners. London: SAGE 2013.
- 21
- 22 40. Sullivan CM, Cain D. Ethical and safety considerations when obtaining information from or about
- 23 battered women for research purposes. *J Interpers Violence* 2004;19(5):603-18. doi:
- 24 10.1177/0886260504263249 [published Online First: 2004/04/24]
- 25
- 26 41. Head E. The ethics and implications of paying participants in qualitative research. *Int J Soc Res*
- 27 *Methodol* 2009;12(4):335-44. doi: 10.1080/13645570802246724
- 28
- 29 42. INVOLVE. Policy on payment of fees and expenses for members of the public actively involved
- 30 with INVOLVE 2016 [Available from: [https://www.invo.org.uk/wp-](https://www.invo.org.uk/wp-content/uploads/2016/05/INVOLVE-internal-payment-policy-2016-final-1.pdf)
- 31 [content/uploads/2016/05/INVOLVE-internal-payment-policy-2016-final-1.pdf](https://www.invo.org.uk/wp-content/uploads/2016/05/INVOLVE-internal-payment-policy-2016-final-1.pdf).
- 32
- 33 43. World Health Organization Regional Office for Europe. United Kingdom Physical Activity
- 34 Factsheet 2018 [Available from:
- 35 [http://www.euro.who.int/\\_](http://www.euro.who.int/_data/assets/pdf_file/0004/382585/united-kingdom-eng.pdf?ua=1)
- 36 [data/assets/pdf\\_file/0004/382585/united-kingdom-](http://www.euro.who.int/_data/assets/pdf_file/0004/382585/united-kingdom-eng.pdf?ua=1)
- 37 [eng.pdf?ua=1](http://www.euro.who.int/_data/assets/pdf_file/0004/382585/united-kingdom-eng.pdf?ua=1).
- 38
- 39 44. National Health Service. Get active your way 2018 [Available from: [https://www.nhs.uk/live-](https://www.nhs.uk/live-well/exercise/get-active-your-way/)
- 40 [well/exercise/get-active-your-way/](https://www.nhs.uk/live-well/exercise/get-active-your-way/).
- 41
- 42 45. Sport Australia. Find your 30 2020 [Available from: <https://www.sportaus.gov.au/findyour30>.
- 43
- 44 46. Bondaronek P, Alkhalidi G, Slee A, et al. Quality of Publicly Available Physical Activity Apps:
- 45 Review and Content Analysis. *JMIR Mhealth Uhealth* 2018;6(3):e53-e53. doi:
- 46 10.2196/mhealth.9069
- 47
- 48 47. Roberts AL, Potts HW, Koutoukidis DA, et al. Breast, Prostate, and Colorectal Cancer Survivors'
- 49 Experiences of Using Publicly Available Physical Activity Mobile Apps: Qualitative Study. *JMIR*
- 50 *Mhealth Uhealth* 2019;7(1):e10918-e18. doi: 10.2196/10918
- 51
- 52 48. Bradbury K, Steele M, Corbett T, et al. Developing a digital intervention for cancer survivors: an
- 53 evidence-, theory- and person-based approach. *NPJ Digit Med* 2019;2:85. doi:
- 54 10.1038/s41746-019-0163-4 [published Online First: 2019/09/12]
- 55
- 56 49. Taylor RM, Solanki A, Aslam N, et al. A participatory study of teenagers and young adults views
- 57 on access and participation in cancer research. *Eur J Oncol Nurs* 2016;20:156-64. doi:
- 58 <https://doi.org/10.1016/j.ejon.2015.07.007>
- 59
- 60 50. Hendricks-Ferguson VL, Cherven BO, Burns DS, et al. Recruitment Strategies and Rates of a Multi-
- Site Behavioral Intervention for Adolescents and Young Adults With Cancer. *J Pediatr Health*
- Care 2013;27(6):434-42. doi: 10.1016/j.pedhc.2012.04.010
- 51
- 52 51. Irani E. The Use of Videoconferencing for Qualitative Interviewing: Opportunities, Challenges,
- 53 and Considerations. *Clin Nurs Res* 2019;28(1):3-8. doi: 10.1177/1054773818803170
- 54
- 55 52. El-Kotob R, Giangregorio LM. Pilot and feasibility studies in exercise, physical activity, or
- 56 rehabilitation research. *Pilot Feasibility Stud* 2018;4:137-37. doi: 10.1186/s40814-018-0326-
- 57 0
- 58 53. Moore GF, Audrey S, Barker M, et al. Process evaluation of complex interventions: Medical
- 59 Research Council guidance. *BMJ* 2015;350:h1258. doi: 10.1136/bmj.h1258
- 60

- 1  
2  
3 54. American Cancer Society. ACS Guidelines on Nutrition and Physical Activity for Cancer Prevention  
4 2020 [Available from: [https://www.cancer.org/healthy/eat-healthy-get-active/acs-](https://www.cancer.org/healthy/eat-healthy-get-active/acs-guidelines-nutrition-physical-activity-cancer-prevention.html)  
5 [guidelines-nutrition-physical-activity-cancer-prevention.html](https://www.cancer.org/healthy/eat-healthy-get-active/acs-guidelines-nutrition-physical-activity-cancer-prevention.html).  
6  
7 55. Macmillan Cancer Support. Physical Activity 2020 [Available from:  
8 [https://www.macmillan.org.uk/about-us/health-professionals/programmes-and-](https://www.macmillan.org.uk/about-us/health-professionals/programmes-and-services/physical-activity)  
9 [services/physical-activity](https://www.macmillan.org.uk/about-us/health-professionals/programmes-and-services/physical-activity).  
10 56. Grimmett C, Corbett T, Brunet J, et al. Systematic review and meta-analysis of maintenance of  
11 physical activity behaviour change in cancer survivors. *Int J Behav Nutr Phys Act*  
12 2019;16(1):37-37. doi: 10.1186/s12966-019-0787-4  
13 57. Turner RR, Steed L, Quirk H, et al. Interventions for promoting habitual exercise in people living  
14 with and beyond cancer. *Cochrane Database Syst Rev* 2018(9) doi:  
15 10.1002/14651858.CD010192.pub3  
16  
17  
18  
19  
20  
21  
22  
23  
24  
25  
26  
27  
28  
29  
30  
31  
32  
33  
34  
35  
36  
37  
38  
39  
40  
41  
42  
43  
44  
45  
46  
47  
48  
49  
50  
51  
52  
53  
54  
55  
56  
57  
58  
59  
60

For peer review only

**Table 1: Domains, actions and planned methods to develop physical activity intervention for childhood cancer survivors**

| Key actions to consider for intervention development <sup>16</sup>                                                                                                                                | Domain of intervention development and associated specific action(s) <sup>15</sup>                                                                                                                                                                                                                                                                                                                            | Methods utilised, or planned in this research to develop intervention                                                                                                                                                                                                                                                                                                                                                                                                                                                                                                           |
|---------------------------------------------------------------------------------------------------------------------------------------------------------------------------------------------------|---------------------------------------------------------------------------------------------------------------------------------------------------------------------------------------------------------------------------------------------------------------------------------------------------------------------------------------------------------------------------------------------------------------|---------------------------------------------------------------------------------------------------------------------------------------------------------------------------------------------------------------------------------------------------------------------------------------------------------------------------------------------------------------------------------------------------------------------------------------------------------------------------------------------------------------------------------------------------------------------------------|
| Planning the process<br>Involving stakeholders<br>Bringing together a team                                                                                                                        | <b>Conception</b>                                                                                                                                                                                                                                                                                                                                                                                             |                                                                                                                                                                                                                                                                                                                                                                                                                                                                                                                                                                                 |
|                                                                                                                                                                                                   | 1. Identifying the problem in need of a new intervention (including the health problem, the problematic behaviour and the target population)                                                                                                                                                                                                                                                                  | <ul style="list-style-type: none"> <li>• Identification and evaluation of the literature on:               <ul style="list-style-type: none"> <li>- Prevalence of cardiovascular late effects in CCSs</li> <li>- Low PA in CCSs</li> <li>- Benefit of PA to the health of CCSs</li> </ul> </li> <li>• Clinical experience/knowledge of low PA in CCSs.</li> </ul>                                                                                                                                                                                                               |
| Reviewing published evidence<br>Undertaking primary data collection<br>Drawing on existing theories<br>Articulate programme theory<br>Understanding context<br>Attending to future implementation | <b>Planning</b>                                                                                                                                                                                                                                                                                                                                                                                               |                                                                                                                                                                                                                                                                                                                                                                                                                                                                                                                                                                                 |
|                                                                                                                                                                                                   | 2. Setting up a planning group/development team                                                                                                                                                                                                                                                                                                                                                               | <ul style="list-style-type: none"> <li>• Establishing a multidisciplinary steering group involving:               <ul style="list-style-type: none"> <li>- Researchers and academics with expertise in health psychology, behavioural science/intervention development, exercise physiology, PA interventions in clinical populations, digital health innovation.</li> <li>- HCPs and service providers (consultant oncologists, nurse specialists).</li> <li>- Patient representatives.</li> </ul> </li> </ul>                                                                 |
|                                                                                                                                                                                                   | 3. Understanding the problem to be addressed<br><br><i>i. Understanding the views and experiences and psycho-social of the potential target population</i>                                                                                                                                                                                                                                                    | <ul style="list-style-type: none"> <li>• Use of patient and public involvement during initial stages of planning:               <ul style="list-style-type: none"> <li>- Gaining young peoples' views of PA and the study concept via an NHS young persons' advisory group</li> <li>- Consultation with CCSs on the need for PA interventions via focus group and survey methods</li> </ul> </li> <li>• Identification of literature reporting HCPs (who may be involved in the resulting intervention) views of PA in CCSs, and the provision of PA advice to CCSs.</li> </ul> |
|                                                                                                                                                                                                   | <i>ii. Assessing the causes of the problems</i>                                                                                                                                                                                                                                                                                                                                                               | <ul style="list-style-type: none"> <li>• Undertaking research to explore and understand CCSs views and experiences of PA               <ul style="list-style-type: none"> <li>- Literature review of the barriers and facilitators to PA in CCSs</li> <li>- Undertaking in-depth interviews with CCSs and their parents regarding their views and experiences of PA, including perceived barriers and facilitators (informed by the Theoretical Domains Framework)</li> <li>- Creating a logic model of the problem</li> </ul> </li> </ul>                                      |
| <i>iii. Describing and understanding the wider context of the target population and the context in which the intervention will be implemented</i>                                                 | <ul style="list-style-type: none"> <li>• Undertaking research to explore the views of CCSs views of receiving lifestyle/PA advice in follow-up care.               <ul style="list-style-type: none"> <li>- Survey and interviews with CCSs attending follow-up care</li> </ul> </li> <li>• Involving HCPs, service providers and patients in steering group and in co-production of intervention.</li> </ul> |                                                                                                                                                                                                                                                                                                                                                                                                                                                                                                                                                                                 |
| <i>iv. Identifying the effectiveness of interventions for PA in CCSs</i>                                                                                                                          | <ul style="list-style-type: none"> <li>• Identification and evaluation of existing PA interventions in CCSs.               <ul style="list-style-type: none"> <li>- Systematic reviews of PA interventions in CCSs</li> <li>- Research evaluating PA interventions in CCSs</li> </ul> </li> </ul>                                                                                                             |                                                                                                                                                                                                                                                                                                                                                                                                                                                                                                                                                                                 |



|                                                                                                                              |                                                                                                                                  |                                                                                                                                                                                                                                                                                                                                                                  |
|------------------------------------------------------------------------------------------------------------------------------|----------------------------------------------------------------------------------------------------------------------------------|------------------------------------------------------------------------------------------------------------------------------------------------------------------------------------------------------------------------------------------------------------------------------------------------------------------------------------------------------------------|
|                                                                                                                              | v. <i>Understanding wider stakeholders' perspectives of problems and issues</i>                                                  | <ul style="list-style-type: none"> <li>Actively engage with stakeholders, service providers and patients throughout research and in co-production of intervention.</li> </ul>                                                                                                                                                                                    |
| Drawing on existing theories<br>Articulating programme theory<br>Understanding context<br>Attending to future implementation | 4. <i>Making decisions about aims and goals of intervention</i>                                                                  | Based on the evidence generated in WP1, the steering group and research team will make decisions on the specific aims and goals of intervention. These will be presented and discussed in co-design workshops.                                                                                                                                                   |
|                                                                                                                              | 5. <i>Identifying what needs to change, how to bring about change</i>                                                            | Following WP1 a logical model of change will be developed for PA in CCS drawing on the evidence and constructs from relevant theories.                                                                                                                                                                                                                           |
|                                                                                                                              | 6. <i>Specify who will change, how and when</i>                                                                                  | <ul style="list-style-type: none"> <li>Following WP1 the steering group and research team will break down the behavioural outcomes to consider, prioritise and map who needs to change what, how changes will occur as a result of the intervention and when these changes are expected to take place.</li> </ul>                                                |
|                                                                                                                              | 7. <i>Considering the real-world issues about cost and delivery of any intervention to reduce risk of implementation failure</i> | <ul style="list-style-type: none"> <li>Involvement of HCPs/service providers in development team</li> <li>Co-design workshops with stakeholders (including HCPs)</li> <li>Use of Normalisation Theory Process to inform discussion with HCPs</li> </ul>                                                                                                          |
|                                                                                                                              | 8. <i>Considering whether it is worthwhile continuing with development of intervention</i>                                       | <ul style="list-style-type: none"> <li>Steering group and stakeholder input on feasibility of intervention</li> </ul>                                                                                                                                                                                                                                            |
| Designing and refining intervention                                                                                          | <b>Designing</b>                                                                                                                 |                                                                                                                                                                                                                                                                                                                                                                  |
|                                                                                                                              | 9. <i>Generating ideas about solutions and components and features of an intervention</i>                                        | <ul style="list-style-type: none"> <li>Mapping of behavioural determinants onto behaviour change techniques using Behaviour Change Wheel.</li> <li>Co-design workshops using creative methods and activities to enable idea generation</li> </ul>                                                                                                                |
|                                                                                                                              | 10. <i>Re-visit decisions about where to intervene</i>                                                                           | <ul style="list-style-type: none"> <li>Input from stakeholders to make final decisions regarding the scope, the target population, key features and components of intervention which will be further refined during workshops.</li> </ul>                                                                                                                        |
|                                                                                                                              | 11. <i>Make decisions about the content, format and delivery of the intervention</i>                                             | <ul style="list-style-type: none"> <li>Findings of WP1 will be combined into a theoretical model of PA in CCSs and to develop initial ideas about content, format and delivery.</li> <li>Actively engaging with steering group and stakeholders via co-design workshops to obtain views on the potential content, format and delivery of intervention</li> </ul> |
|                                                                                                                              | 12. <i>Design an implementation plan, thinking about who will adopt the intervention and maintain it</i>                         | <ul style="list-style-type: none"> <li>Design of potential implementation plan will be informed by discussions with HCPs and other stakeholder regarding potential implementation barriers and previous research.</li> </ul>                                                                                                                                     |
|                                                                                                                              | <b>Creating</b>                                                                                                                  |                                                                                                                                                                                                                                                                                                                                                                  |
|                                                                                                                              | 13. <i>Make prototypes/mock-ups of the intervention where relevant</i>                                                           | <ul style="list-style-type: none"> <li>Generation and discussion of mock-ups and paper-based prototypes during co-design workshop. Feedback</li> </ul>                                                                                                                                                                                                           |

**Table 2: Childhood cancer survivors' inclusion and exclusion criteria**

| Inclusion criteria                                                                            | Exclusion criteria                                                                                                            |
|-----------------------------------------------------------------------------------------------|-------------------------------------------------------------------------------------------------------------------------------|
| Diagnosed with any haematological malignancy or solid or CNS tumour under the age of 19 years | Any cognitive or physical impairment of sufficient severity to limit their ability to understand, engage with or undertake PA |
| Currently aged 10-24 years                                                                    | Any contraindications to exercise                                                                                             |
| Currently 2-15 years from the end of treatment                                                |                                                                                                                               |
| No active disease                                                                             |                                                                                                                               |

For peer review only

1  
2  
3  
4  
5  
6  
7  
8  
9  
10  
11  
12  
13  
14  
15  
16  
17  
18  
19  
20  
21  
22  
23  
24  
25  
26  
27  
28  
29  
30  
31  
32  
33  
34  
35  
36  
37  
38  
39  
40  
41

Input from steering group and PPI

Workpackage 1

### In-depth interviews informed by theory

To identify perceived barriers and facilitators to physical activity.

Childhood cancer survivors (CCSs) recruited from two NHS trusts

Parents of CCSs recruited from two NHS trusts

Thematic analysis of interview data

Previous primary research with childhood cancer survivors and systematic reviews of relevant literature will also inform work package 2

Workpackage 2

### Phase 1: Behavioural analysis

Identifying potentially modifiable determinants of PA in CCSs and developing a theoretical model of PA in CCSs. Identifying potential intervention functions, components and behaviour change techniques.

### Phase 2: Co-design process

#### Stage 1 co-design activities

Testing evidence statements.  
Generate new ideas for interventions.

#### Participants:

CCSs, parents, HCPs, academics/researchers.

#### Output:

Intervention principles.

#### Stage 2 co-design activities

User feedback on intervention principles.  
Develop core intervention ideas/concepts.  
Design prototypes of potential interventions.

#### Participants:

CCSs, parents, HCPs, academics/researchers.

#### Output:

Core concepts.  
Paper prototypes.

Final output: Prototype intervention

Figure 1: Overview of planned research for the BEACON project

# BMJ Open

## Using qualitative and co-design methods to inform the development of an intervention to support and improve physical activity in childhood cancer survivors: a study protocol for BEing Active after ChildhOod caNcer (BEACON)

|                                 |                                                                                                                                                                                                                                                                                                                                                                                                                                                                                                                                                                                                                                                                                                                                                                                                                                                                                                                                                                                                |
|---------------------------------|------------------------------------------------------------------------------------------------------------------------------------------------------------------------------------------------------------------------------------------------------------------------------------------------------------------------------------------------------------------------------------------------------------------------------------------------------------------------------------------------------------------------------------------------------------------------------------------------------------------------------------------------------------------------------------------------------------------------------------------------------------------------------------------------------------------------------------------------------------------------------------------------------------------------------------------------------------------------------------------------|
| Journal:                        | <i>BMJ Open</i>                                                                                                                                                                                                                                                                                                                                                                                                                                                                                                                                                                                                                                                                                                                                                                                                                                                                                                                                                                                |
| Manuscript ID                   | bmjopen-2020-041073.R2                                                                                                                                                                                                                                                                                                                                                                                                                                                                                                                                                                                                                                                                                                                                                                                                                                                                                                                                                                         |
| Article Type:                   | Protocol                                                                                                                                                                                                                                                                                                                                                                                                                                                                                                                                                                                                                                                                                                                                                                                                                                                                                                                                                                                       |
| Date Submitted by the Author:   | 02-Nov-2020                                                                                                                                                                                                                                                                                                                                                                                                                                                                                                                                                                                                                                                                                                                                                                                                                                                                                                                                                                                    |
| Complete List of Authors:       | Brown, Morven; Newcastle University, Newcastle upon Tyne, Population Health Sciences Institute; Newcastle University Centre for Cancer, Araujo-Soares, Vera; Newcastle University, Population Health Sciences Institute; Newcastle University Centre for Cancer<br>Skinner, Roderick; Newcastle University Centre for Cancer; Great North Children's Hospital, Department of Paediatric and Adolescent Haematology and Oncology<br>Glaser, Adam; University of Leeds, Leeds Institute of Medical Research; Leeds Children's Hospital, Department of Paediatric Oncology<br>Sarwar, Naseem; Leeds Children's Hospital, Department of Paediatric Oncology<br>Saxton, John M ; Northumbria University, Department of Sport, Exercise and Rehabilitation, Faculty of Health and Life Sciences<br>Montague, Kyle; Newcastle University, OpenLab<br>Hall, Jamie<br>Burns, Olivia<br>Sharp, Linda; Newcastle University, Population Health Sciences Institute; Newcastle University Centre for Cancer |
| <b>Primary Subject Heading</b>: | Oncology                                                                                                                                                                                                                                                                                                                                                                                                                                                                                                                                                                                                                                                                                                                                                                                                                                                                                                                                                                                       |
| Secondary Subject Heading:      | Qualitative research                                                                                                                                                                                                                                                                                                                                                                                                                                                                                                                                                                                                                                                                                                                                                                                                                                                                                                                                                                           |
| Keywords:                       | Protocols & guidelines < HEALTH SERVICES ADMINISTRATION & MANAGEMENT, Paediatric oncology < ONCOLOGY, QUALITATIVE RESEARCH                                                                                                                                                                                                                                                                                                                                                                                                                                                                                                                                                                                                                                                                                                                                                                                                                                                                     |
|                                 |                                                                                                                                                                                                                                                                                                                                                                                                                                                                                                                                                                                                                                                                                                                                                                                                                                                                                                                                                                                                |

SCHOLARONE™  
Manuscripts



I, the Submitting Author has the right to grant and does grant on behalf of all authors of the Work (as defined in the below author licence), an exclusive licence and/or a non-exclusive licence for contributions from authors who are: i) UK Crown employees; ii) where BMJ has agreed a CC-BY licence shall apply, and/or iii) in accordance with the terms applicable for US Federal Government officers or employees acting as part of their official duties; on a worldwide, perpetual, irrevocable, royalty-free basis to BMJ Publishing Group Ltd ("BMJ") its licensees and where the relevant Journal is co-owned by BMJ to the co-owners of the Journal, to publish the Work in this journal and any other BMJ products and to exploit all rights, as set out in our [licence](#).

The Submitting Author accepts and understands that any supply made under these terms is made by BMJ to the Submitting Author unless you are acting as an employee on behalf of your employer or a postgraduate student of an affiliated institution which is paying any applicable article publishing charge ("APC") for Open Access articles. Where the Submitting Author wishes to make the Work available on an Open Access basis (and intends to pay the relevant APC), the terms of reuse of such Open Access shall be governed by a Creative Commons licence – details of these licences and which [Creative Commons](#) licence will apply to this Work are set out in our licence referred to above.

Other than as permitted in any relevant BMJ Author's Self Archiving Policies, I confirm this Work has not been accepted for publication elsewhere, is not being considered for publication elsewhere and does not duplicate material already published. I confirm all authors consent to publication of this Work and authorise the granting of this licence.

1  
2  
3 **Using qualitative and co-design methods to inform the development of an intervention to support**  
4 **and improve physical activity in childhood cancer survivors: a study protocol for BEing Active after**  
5 **Childhood caNcer (BEACON)**  
6  
7

8  
9 **Morven C Brown<sup>1,2</sup> Vera Araújo-Soares<sup>1,2</sup>, Roderick Skinner<sup>2,3</sup>, Adam W Glaser<sup>4,5</sup>, Naseem Sarwar<sup>4</sup>,**  
10 **John Saxton<sup>6</sup>, Kyle Montague<sup>7</sup>, Jamie Hall<sup>8</sup>, Olivia Burns<sup>8</sup>, Linda Sharp<sup>1,2\*</sup>**  
11  
12

- 13  
14 1. Population Health Sciences Institute, Newcastle University, Newcastle upon Tyne, UK  
15  
16 2. Newcastle University Centre for Cancer, Newcastle University, Newcastle upon Tyne, UK  
17  
18 3. Department of Paediatric and Adolescent Haematology and Oncology, Great North Children's  
19 Hospital, Newcastle upon Tyne Hospitals NHS Trust, Newcastle upon Tyne, UK  
20  
21 4. Department of Paediatric Oncology, Leeds Children's Hospital, Leeds Teaching Hospitals NHS  
22 Trust, Leeds, UK  
23  
24 5. Leeds Institute of Medical Research, University of Leeds, Leeds, UK  
25  
26 6. Department of Sport, Exercise and Rehabilitation, Faculty of Health and Life Sciences,  
27 Northumbria University, Newcastle upon Tyne, UK  
28  
29 7. OpenLab, Newcastle University, Newcastle upon Tyne, UK  
30  
31 8. Patient and public representatives for the study  
32

33 \*Corresponding author: Linda Sharp, Population Health Sciences Institute, Newcastle University, Sir  
34 James Spence Institute, Royal Victoria Infirmary, Queen Victoria Road, NE1 4LP. Email:  
35 linda.sharp@ncl.ac.uk. Tel: +44 191 208 6275  
36  
37  
38

39 **Morven Brown:** morven.brown@ncl.ac.uk

40  
41 **Vera Araújo-Soares:** vera.araujo-soares@ncl.ac.uk

42  
43 **Roderick Skinner:** roderick.skinner@ncl.ac.uk

44  
45 **Adam Glaser:** a.glaser@nhs.net

46  
47 **Naseem Sarwar:** n.sarwar@nhs.net

48  
49 **John Saxton:** john.saxton@northumbria.ac.uk

50  
51 **Kyle Montague:** kyle.montague@ncl.ac.uk

52  
53 **Jamie Hall:** jamie.hall@hotmail.com

54  
55 **Olivia Burns:** oliviaburns96@outlook.com

56  
57 **Linda Sharp:** linda.sharp@ncl.ac.uk

58 **Keywords:** child; cancer survivors; exercise; health behaviour; behavioural sciences

59  
60 **Word count:** 4549

## ABSTRACT

### Introduction:

Childhood cancer survivors (CCSs) treated with cardiotoxic cancer treatments are at increased risk of developing cardiometabolic complications. This risk is further exacerbated by poor health behaviours. In particular, CCSs are less active than non-cancer comparators. Existing interventions aiming to improve physical activity (PA) levels in CCSs are methodologically weak. The aim of this study is to rigorously and systematically develop an evidence- and theory-based intervention to promote, support, improve and sustain PA levels in CCSs, with the long-term goal of reducing CCSs' cardiovascular morbidity and mortality.

### Methods and analysis:

The Being Active after Childhood Cancer (BEACON) study involves two workpackages at two NHS sites in England, UK. *Participants:* CCSs and their parents, and healthcare professionals (HCPs) involved in their care. *Methods:* Workpackage one (WP1) will use qualitative methods to explore and understand the barriers and facilitators to PA in CCSs. Two sets of semi-structured interviews will be conducted with (i) CCSs (aged 10 -24 years) and (ii) parents of CCSs. Workpackage two (WP2) will use co-design methods to bring together stakeholders (CCSs; their parents; HCPs; researchers) to develop a prototype intervention. Where possible, all data will be audio-recorded and transcribed. *Analysis:* Data from WP1 will be analysed using a thematic approach. Analysis of WP2 data will involve content analysis, and analysis of formative output and procedures.

### Ethics and dissemination:

The study was approved by North East - Tyne & Wear South Research Ethics Committee (REC ref: 18/NE/0274). Research findings will be disseminated primarily via national and international conferences and publication in peer-reviewed journals. Patient and public involvement (PPI) will inform further dissemination activities.

## ARTICLE SUMMARY

### Strengths and limitations of this study

- The BEACON study will provide in-depth knowledge on the barriers and facilitators to PA in CCSs.
- The use of recognised frameworks of intervention development and principles from behavioural science to systematically develop an evidence- and theory-based health behaviour change intervention is a significant strength.
- Intervention development will actively engage stakeholders (CCSs, parents and healthcare professionals), ensuring that the resulting intervention is co-produced with those it aims to support, and maximizing likely acceptability and feasibility.
- Strategies will mitigate against potential sources of bias and challenges in recruitment. COVID-19 guidelines at the time of study, as well as participant preference, will dictate the



1  
2  
3 modes of participation. As such we offer multiple ways in which individuals may contribute  
4 to the study and recognise the potential limitations of conducting co-design work remotely.  
5

- 6 • The prototype intervention developed will be ready to be taken forward into production and  
7 testing.  
8  
9

## 10 11 INTRODUCTION

12  
13 As a result of treatment advances, the population of childhood cancer survivors (CCSs) has rapidly  
14 grown. In the UK alone, there are more than 40,000 CCSs,<sup>1</sup> whilst across Europe there may be up to  
15 500,000.<sup>2</sup> Two-thirds of CCSs may develop chronic health conditions by 15-25 years post-diagnosis.<sup>3</sup>  
16 In particular, those treated with cardiotoxic therapies can experience persistent and cumulative  
17 damage to their cardiovascular, pulmonary and metabolic systems.<sup>4</sup> Cardiovascular complications  
18 are a leading cause of morbidity among CCSs, and British CCSs have a 3.4-fold excess risk of cardiac  
19 death.<sup>5</sup> Development of these chronic conditions impacts adversely not only on the survivors'  
20 physical health, but also on their psychological health and wellbeing and incurs costs for the  
21 healthcare system.  
22  
23

24  
25 In the general population, it is well recognised that poor cardiovascular outcomes are strongly  
26 related to modifiable health behaviours, including a lack of physical activity (PA).<sup>6</sup> Similarly, low  
27 levels of PA in even young CCSs (<18 years), have been linked to a worse cardiovascular risk profile,<sup>7</sup>  
28 and CCSs are often less active than controls without a history of cancer.<sup>8</sup> However, amongst long-  
29 term survivors of childhood lymphoma, a higher levels of vigorous PA is associated with a 50% lower  
30 risk of any cardiovascular event.<sup>9</sup> Moreover, a Cochrane review indicated that physical exercise  
31 training programmes may improve physical fitness, body composition and cardiorespiratory fitness  
32 in childhood cancer patients and survivors.<sup>10</sup> Considered together, this evidence provides a strong  
33 rationale for developing effective interventions to increase PA in CCSs.  
34  
35

36  
37 Reviews have concluded that interventions to increase PA levels among CCSs are feasible and safe.  
38 However, studies are heterogeneous and most are methodologically limited.<sup>11 12</sup> In addition, there is  
39 little evidence that interventions have been systematically developed using recognised frameworks  
40 of intervention development.<sup>13</sup> Critically, while an understanding of factors which may promote or  
41 inhibit the target health behaviour (here, PA) is an essential first step in intervention design,<sup>14-17</sup>  
42 most interventions appear to have been developed without having undertaken formative work to  
43 gain this understanding. Indeed, currently, little is known about determinants of PA behaviours in  
44 CCSs. Additionally, although the application of appropriate theory is recognised in behavioural  
45 science as an essential element of behaviour change interventions,<sup>14-17</sup> most interventions appear to  
46 have no robust theoretical underpinnings.  
47  
48

49  
50 Leading authorities advocate active stakeholder involvement in the design and development of  
51 novel health interventions,<sup>14-17</sup>; this is essential to understanding the perspectives and psychosocial  
52 context of users.<sup>18</sup> However, most interventions for CCSs have been developed without the  
53 involvement of CCSs, raising concerns about the relevance and acceptability of the interventions to  
54 survivors. Moreover, although parents are key agents in their children's PA behaviour,<sup>19 20</sup> there has  
55 been little attempt to understand either: (i) how the beliefs of parents of CCSs might influence their  
56 child's PA behaviours, or (ii) how parental support may be harnessed to encourage PA in CCSs.  
57

58  
59 A further consideration is wider implementation of interventions among CCSs. Those developed thus  
60 far were not designed to be deliverable within the context of the UK National Health Service (NHS).

1  
2  
3 More generally, there is a lack of research exploring how support to modify health behaviours  
4 (including PA) among CCSs can be implemented effectively and feasibly in follow-up care.  
5 Involvement of HCPs and other relevant stakeholders in the development process would increase  
6 the likelihood that an intervention will be feasible, acceptable and implementable in the current  
7 healthcare pathway for CCSs; this does not appear to have been widely done.  
8  
9

10 This project seeks to comprehensively investigate barriers and enablers to PA among CCSs – from  
11 the CCSs, parental and wider stakeholder perspective. Using the knowledge gained, and with the  
12 support of key stakeholders, we will develop a person-centred evidence- and theory-based  
13 prototype intervention aimed at promoting and supporting sustainable PA behaviour change in  
14 CCSs.  
15  
16

## 17 18 **AIMS AND OBJECTIVES**

### 19 20 **Aim**

21  
22 The ultimate goal of the BEACON project is to develop an intervention which can reduce  
23 cardiometabolic risk markers in the medium-term, and reduce cardiovascular morbidity and  
24 mortality in the long-term, whilst also helping to prevent a deterioration in patient well-being and  
25 health-related quality of life due to poor cardiovascular health.  
26  
27

### 28 29 **Objectives**

30 The objectives of this phase of the BEACON project are to:

- 31 1) explore CCSs' experiences of, and participation in, PA behaviours.
- 32 2) identify and explore the barriers and enablers of PA behaviours in CCSs.
- 33 3) explore CCSs' and parents' experiences of receiving advice on PA or exercise, and perceived  
34 need for this information.
- 35 4) actively engage key stakeholders (CCSs, their parents, HCPs) in a co-design process to  
36 develop a prototype intervention.  
37  
38  
39  
40  
41  
42

## 43 44 **METHODS AND ANALYSIS**

### 45 46 **Study design**

47 The study will be informed by intervention development approaches - notably the Medical Research  
48 Council framework of intervention development<sup>15</sup> and the Person-Based Approach<sup>18</sup> to ensure that  
49 the resulting intervention is systematically developed from the bottom-up and: 1) is theory- and  
50 evidence-based;<sup>14 15 17 21-23</sup> 2) prioritises and incorporates the views of the people who will use the  
51 intervention;<sup>18 24</sup> and 3) is likely to be implementable and scalable in the NHS.<sup>25 26</sup> The current phase  
52 of the project is focused on the intervention development. The planned research activities (which  
53 form two sequential workpackages), and the other formative work previously undertaken by the  
54 study team which will feed into intervention development, are summarized in Table 1 and Figure 1.  
55 Workpackage 1 (WP1) will generate evidence on determinants of PA among CCSs. Workpackage 2  
56 (WP2) will involve a co-design process to produce a prototype intervention.  
57  
58  
59  
60

## Participants

WP1 involves CCSs and parents/guardians of CCSs; eligibility criteria are shown in Table 2. Participants will be recruited via two clinical sites which are both specialist centres in childhood cancer treatment.

WP2 will recruit CCSs, parents/guardians of CCSs and HCPs. The same inclusion and exclusion criteria as for WP1 will apply for CCSs and parents/guardians. HCPs will be eligible if they are involved in the follow-up care of CCSs. Academics and researchers with relevant expertise will also be eligible.

## Sampling

### WP1: Generating evidence on determinants of PA among CCSs

Potential participants will be selected using purposive sampling with strata comprising of: age (for CCSs - current age of 10-15/16-24 years; for parents/guardians - age of child at diagnosis:  $\leq 10$ ; 11-18 years); clinical site); and cancer site (haematological malignancy/solid tumour/central nervous system tumour). Diversity in other characteristics (e.g. gender, treatment, time since diagnosis) will be sought to ensure sample heterogeneity and elicitation of a broad range of views and experiences.

Recruitment will continue until data saturation is reached in each interview set, defined as no new themes arising in the last three interviews.<sup>27</sup> We estimate that, interviews with 25-30 CCSs and 25-30 parents/guardians will provide adequate data. CCSs may participate without their parent/guardian taking part, and vice versa.

### WP2: Co-design process

Up to 40 CCSs, parents/guardians of survivors, HCPs and academics/researchers will take part in the co-design process. At least 20 participants will be CCSs (due to the nature of the activities, participation is deemed only to be suitable for CCSs aged 16 and above) and 10 will be parents/guardians. As with the interviews, it will be important to seek diversity in the participants.

HCPs invited to take part in WP2 will include consultant oncologists and nurse specialists from paediatric and teenage and young adult services and other relevant HCPs (e.g. occupational therapists, physiotherapists, psychologists, cardiologists). The aim is that at least six HCPs will participate in the co-design process. Academics/researchers with expertise in the following fields will also participate: behavioural science, health psychology, PA and exercise science, healthcare technologies and human-centred design, and childhood cancer survivorship.

## Identification, screening and recruitment of sample

Identification and screening of CCSs began in February 2019 with recruitment expected to end December 2020.

### WP1: Generating evidence on determinants of PA among CCSs

Employing multiple recruitment strategies can guard against recruitment problems,<sup>28</sup> therefore, we will use up to three methods for recruiting participants. The primary method will require consultant oncologists/nurse specialists to screen attendance lists of forthcoming CCSs follow-up clinics at

1  
2  
3 collaborating sites. At the clinic, eligible CCSs and their parents/guardians will be informed of the  
4 study by their child's oncologist/nurse specialist and asked if they would like to meet the researcher  
5 (MB). If so, the researcher (MB) will provide further details including the study information sheet  
6 and answer any questions. Potentially interested CCSs and parents/guardians will be asked whether  
7 the researcher can contact them in a few days to find out whether they would like to participate.  
8 Meeting the researcher at clinic will help potential participants feel more at ease and aid the  
9 establishment of rapport, which may be particularly important for younger patients.<sup>29</sup>  
10  
11

12 Approvals are in place for variants of this process in the event that the researcher cannot attend the  
13 clinic, or the clinic is too busy for collaborating clinical colleagues to approach eligible CCSs and  
14 parents/guardians individually. These include (1) clinical colleagues recording details of those  
15 potentially interested of behalf of the researcher, who will follow-up by phone and (2) provision of  
16 study packs (containing a reply slip) to eligible CCSs and parents/guardians at clinic check-in with  
17 those interested returning the reply slip in a sealed envelope to the receptionist to forward to the  
18 researcher.  
19  
20

21 The second method will involve consultant oncologists/nurse specialists at the two sites screening  
22 patients in their care for eligibility and mailing a study information sheet; follow-up telephone calls  
23 by the clinical colleagues are permitted. Interested CCSs and parents/guardian may contact the  
24 researcher directly.  
25  
26

27 The third method, if required, will be identification of survivors via cancer registries in the study  
28 areas: the Northern Region Young Person's Malignant Disease Registry (NRYPMDR) and the  
29 Yorkshire Specialist Register of Cancer in Children and Young People (YSRCCYP).  
30

31 Information sheets for CCSs are developmentally appropriate and designed for ages 10-12, 13-15  
32 and ≥16 years. CCSs aged 10-15 years will also receive a copy of the Charter of Rights for Children  
33 and Young People in Research.<sup>30</sup> Parents of CCSs aged 10-15 years will receive an information sheet  
34 explaining the study their child has been invited to participate in.  
35  
36  
37  
38

### 39 WP2: Co-design process

40 WP1 participants will be asked if they wish to be notified of/invited to the co-design activities. New  
41 participants, without experience of the study, will also be recruited. Methods for recruiting CCSs and  
42 their parents/guardians will mirror those of WP1. In addition, we will also seek to recruit via social  
43 media, support groups and charities. Posts advertising the study will ask for interested individuals to  
44 contact the researcher who will assess eligibility and provide further information.  
45  
46

47 Eligible HCPs working at the collaborating sites will be invited to take part. We will also promote the  
48 study via social media, and through networks of the Childhood Cancer & Leukaemia Group, to  
49 encourage participation of HCPs from across UK. Academics and researchers experienced in relevant  
50 areas (also previously stated) will also be asked to participate.  
51  
52  
53  
54  
55

### 56 **Data collection**

#### 57 WP1: Generating evidence on determinants of PA among CCSs

58  
59  
60

1  
2  
3 Interviews with CCSs aged 10-15 years will take place face-to-face at the interviewee's and their  
4 parents preferred location (e.g. university/home). A parent/guardian may be present if they or the  
5 child wishes. These interviews are expected to last 30-60 minutes, but length will be determined by  
6 the child.  
7

8 Interviews with CCSs aged  $\geq 16$  years, and those with parents/guardians, will take place by  
9 telephone, an end-to-end encrypted web app which enables secure audio/video calls (e.g.  
10 WhatsApp, Zoom), or face-to-face at a location of their choosing; providing choice on ways to  
11 participate can help maximise recruitment.<sup>28</sup> Experience suggests these interview will last 60-90  
12 minutes<sup>31</sup>, but may be longer if the interviewee wishes.  
13  
14

15 Before the interview commences, the researcher will seek informed consent; for those aged 10-15  
16 years, a parent/guardian will provide consent and the interviewee assent to ensure that the child  
17 feels involved in the decision about their participation.<sup>32</sup> Participants (and parents on behalf of  
18 children aged 10-15 years) will be asked to complete a short demographic questionnaire. Time will  
19 be spent developing rapport and creating a secure, trusting environment,<sup>28</sup> particularly with younger  
20 children.<sup>29</sup>  
21  
22

23 The interviews will be guided by a topic guide, which will be informed by the Theoretical Domains  
24 Framework (TDF), an integrative framework of behaviour change theories,<sup>21 22</sup> and will cover:  
25 participant's views and attitudes towards their own/their child's PA; difficulties experienced with,  
26 and barriers to, PA; whether support/advice has been given regarding PA; and what helps or would  
27 help the survivor to be more active. Questions will be open and neutral. Topic guides will be used  
28 flexibly to allow interviewees to raise issues they consider important to the topic (PA); if this results  
29 in new areas, these will be explored in subsequent interviews to ensure sufficient depth is reached.  
30  
31

32 Interview content will be developmentally appropriate. Interviews with children aged 10-15 years  
33 will utilise cue cards and images to help engage and focus the participant and provide them with  
34 some control over the order of the questions.<sup>29</sup> With the interviewees' permission, interviews will be  
35 audio-recorded; if permission for recording is not granted, the researcher will take detailed notes.  
36  
37  
38  
39

#### 40 WP2: Co-design process

41 We will follow the sequential and systematic co-design approach to integrate scientific evidence,  
42 expert knowledge and experience, and stakeholder involvement to design a prototype  
43 intervention.<sup>24</sup> The two phases of WP2 are described below.  
44  
45  
46  
47

##### 48 *Phase 1: Behavioural analysis*

49 The researcher team will combine WP1 findings and other formative work previously conducted  
50 (e.g. a systematic review) (Figure 1), into a "theoretical model" of PA engagement among CCSs. They  
51 will identify which influences on PA are potentially modifiable to determine what needs to be done  
52 to change behaviours. The Behaviour Change Wheel will be used to map the TDF domains, and  
53 organise these into a working theoretical model of PA in CCSs.<sup>23</sup> For each identified factor the team  
54 will identify which intervention functions might be effective in changing PA behaviours. For each of  
55 the relevant intervention functions, associated behavioural change techniques will be identified (i.e.  
56 the techniques that can be used to overcome barriers to, and enhance enablers of, engagement with  
57 PA).<sup>33</sup>  
58  
59  
60

## Phase 2: Co-design process

This process will involve a range of methods in order to engage and collaborate with stakeholders flexibly. Due to the current global COVID-19 pandemic, we will offer multiple modes of participation including workshops (face-to-face or online), interviews (one-to-one or small groups of 2/3 people; face-to-face or online); and online collaborative groups. The mode of participation will be guided by participant preference, as well as COVID-19 guidelines at the time of study.

Face-to-face workshops are expected to last 3-4 hours, while those online will be shorter (1-2 hours). Interviews are likely to also last 1-2 hours. Video-conferencing is an acceptable method for discussion with young people and an optimal alternative to face-to-face groups; it also enables people from various geographical location to attend.<sup>34</sup>

Online collaborative groups allow stakeholders to engage with the development process, and one another, both in real time and asynchronously. Secure groups will be set up via WhatsApp, Facebook or an Ideaboard.co.uk website developed specifically for the study. WhatsApp and Facebook are widely used and familiar applications, and have successfully been used for co-design<sup>35 36</sup>; Ideaboard offers greater flexibility. Preferences of potential participants will inform the choice of platform. The team will post content to the groups (e.g. videos, images, questions) and invite feedback.

Following PPI input, CCSs will have the choice to participate in a survivor only or mixed (survivors plus parents/HCPs) workshop/small group interview/collaborative group.

Using these methods, a range of activities (e.g. think aloud, mapping, brainstorming, storyboarding) will be used to engage participants, provide ways for them to share, envision and develop their ideas with others and to facilitate interaction. The specific activities will be dictated by the findings of WP1, and the findings of any preceding workshops.

Two steps in the co-design process are envisioned (Figure 1). In the first step, evidence statements on PA among CCSs will be presented. Stakeholders' views on the relevance, importance and effectiveness will be sought. Activities will be used to generate insights into what is needed to improve PA levels in CCSs and novel intervention ideas which stakeholders think could be effective and acceptable in improving PA in CCSs. Ideas will also be sought for how an intervention should be designed, where and how it should be implemented, and the relevant components. Mapping activities will enable organisation and visualisation of resulting intervention ideas and their key components. The research team will analyse information collected to develop 'intervention principles', ensuring that the evidence and theory, which is central to the success of the intervention, remains intact.<sup>37</sup>

During the second stage activities will focus on gaining user feedback on intervention principles. Content and mode of delivery will be further developed and refined. Intervention tailoring will also be considered. Participants will identify and discuss potential challenges around acceptability, usability and feasibility from different perspectives (e.g. CCSs, parents, HCPs, commissioners, service providers). Based on participants discussion and decisions, designers/creative facilitators will begin to sketch paper-based 'mock-ups' of the intervention.

Outputs will be critically evaluated and translated into a design brief which details the aims of the intervention, the design features it will include, and how these will be operationalised, taking care will to ensure alignment with evidence and theory. A logic model will be developed,<sup>14</sup> providing a graphical/textual representation of how the intervention is intended to work, linking outcomes with



1  
2  
3 processes, the underlying theoretical assumptions and active ingredients (or the behaviour change  
4 methods and techniques that will be used to target the identified processes/mechanism associated  
5 with behaviour and behaviour change).<sup>33,38</sup> The outcome will be a mock-up of the prototype which  
6 will represent the main features of the intervention. This prototype will be ready to take into  
7 production and undergo refinement and optimisation before going forward into further testing in a  
8 future study.  
9

10  
11 Prior to participation in co-design activities, informed consent will be sought and a ground rules for  
12 communication and engagement established. The researchers will ensure an atmosphere which is  
13 welcoming and non-judgemental and will be clear that all participants are treated as equals whether  
14 they are young people, parents, researchers or HCPs.  
15

16 Where possible, co-design activities will be audio or video recorded and transcribed. Other data  
17 collected will include written data/notes, mapping activities and sketches resulting from the various  
18 activities (e.g. group work, brainstorm) and written comments generated by the online collaborative  
19 groups.  
20  
21

## 22 23 24 **Data analysis plan**

### 25 WP1: Generating evidence on determinants of PA among CCSs

26 Interview recordings will be transcribed verbatim. Analysis will occur in parallel with data collection  
27 to ensure that any new issues raised are explored in subsequent interviews. Interviews from CCSs  
28 and parents/guardians will be analysed separately. To identify views and experiences of, and  
29 barriers and facilitators to, PA in CCSs an inductive thematic analysis will be conducted.<sup>39</sup> Two team  
30 members will code data from preliminary interviews and discuss and agree the emerging codes and  
31 potential themes. Codes relating to the barriers and facilitators to PA will be mapped onto the TDF.<sup>21</sup>  
32  
33  
34  
35  
36  
37  
38  
39  
40  
41  
42  
43  
44  
45  
46  
47  
48  
49  
50  
51  
52  
53  
54  
55  
56  
57  
58  
59  
60  
22 These codes will then be applied by the researcher to remaining interviews, incorporating any new  
23 codes and themes as they are identified. For analytical rigour, the classification of belief statements  
24 to the TDF domains will be discussed and agreed within the team. Coding and analysis will be  
25 facilitated by QSR International's NVivo software (Version 12, 2018).

### 26 WP2: Co-design activities

27 Analysis of co-design activities will be focused specifically on the aims of each activity, pragmatic and  
28 expeditious so findings can be fed into subsequent stages.<sup>37</sup> Qualitative content analysis will be  
29 performed using QSR International's NVivo software (Version 12, 2018), supplemented by other  
30 forms of analysis as required.  
31  
32  
33  
34  
35  
36  
37  
38  
39  
40  
41  
42  
43  
44  
45  
46  
47  
48  
49  
50  
51  
52  
53  
54  
55  
56  
57  
58  
59  
60

## 51 **Ethics and dissemination**

52 A favourable opinion has been granted from the North East - Tyne & Wear South Research Ethics  
53 Committee (REC ref: 18/NE/0274).  
54  
55

56 Informed consent will be sought prior to participation. Participants will be informed that  
57 participation is entirely voluntary, and they may withdraw at any point, without giving a reason and  
58 without negative consequences. They will be asked for their agreement to audio/video record  
59 (where relevant) and informed that recordings are confidential, and transcriptions of audio-  
60



1  
2  
3 recordings will be anonymised. Ethical considerations relating to the interviewing of children (aged  
4 under 16 years) are described above. Interview participants will be offered payment of any travel  
5 expenses and a £20 high-street shopping voucher. This amount is based on the need to provide  
6 some compensation for the participant's time, expertise and contribution to the research but  
7 without coercing individuals to take part when they would rather not.<sup>40</sup> Participants will be notified  
8 of the voucher in the study information sheet and will be offered the voucher at the beginning of the  
9 interview to convey to them that they are being rewarded for their attendance, and not for what  
10 they share during the interview.<sup>41</sup> Participants recruited to co-design activities will receive a high  
11 street voucher which reflects the time commitment and nature of the activity they choose to  
12 participate in, in accordance with INVOLVE guidance.<sup>42</sup>

13  
14 Findings will be disseminated via our study website (<https://research.ncl.ac.uk/beingactive/>),  
15 conferences and journal publication. A summary of research findings will be available for  
16 participants. PPI will inform further dissemination activities (e.g. via patient organisations, social  
17 media), appropriate formats (e.g. infographics, video) and content to ensure lay summaries are  
18 understandable and engaging to survivors.

### 21 22 23 24 25 **Patient and public involvement**

26 Feedback on the study concept and methods were gained from two established PPI groups in  
27 Newcastle: the Young Person's Advisory Group – North England (YPAG-NE) whose members are  
28 young people aged 13-18 years old, and the Perspectives in Cancer Research group whose members  
29 are survivors of adult cancer. Views of young adult CCSs were gained via representatives of two  
30 European cancer organisations, PanCare (Pan-European Network for Care of Survivors after  
31 Childhood and Adolescent Cancer) and Youth Cancer Europe, and a survey posted to a closed  
32 Facebook group for survivors of cancer. YPAG-NE and two adult CCSs provided comments on patient  
33 information and interview topic guides/cue cards. Patient representatives (OB & JH) sit on the  
34 project steering group, and will be involved in data interpretation, co-design activities, and advising  
35 on dissemination.

### 38 39 40 41 **DISCUSSION**

42 A high proportion of adolescents and young adults do not meet recommended levels of PA,<sup>43</sup> and  
43 there are already many publicly available programmes and interventions to encourage PA, including  
44 government/health service initiatives and apps.<sup>44-46</sup> This raises the question of whether a specific PA  
45 intervention is needed for CCSs. While there is considerable overlap between determinants of PA in  
46 CCSs and young people without cancer, many influences are likely specific to CCSs (e.g. cancer-  
47 related fatigue, frustration about impact of cancer).<sup>13</sup> There are also concerns about the quality and  
48 likely effectiveness of many of the publicly-available PA programmes.<sup>46</sup> In addition, cancer survivors  
49 may question the relevance of general (i.e. non-cancer specific) PA programmes to them,<sup>47</sup> and  
50 there is evidence that tailoring interventions to a specific target population is likely to increase  
51 effectiveness.<sup>48</sup> Taken together, this suggests that the route most likely to lead to changes in CCSs'  
52 PA levels is to develop an intervention specifically for this group.

53  
54 The strength of our study lies in the adoption of an evidence-based, person-centred approach.  
55 However, we also recognise the need to mitigate potential study limitations. To minimise selection  
56 bias, the importance of giving all eligible patients the opportunity to hear about the study, and  
57 allowing them make their own choice as to whether they want to participate or not, will be  
58  
59  
60

1  
2  
3 highlighted to those involved in the screening process.<sup>49</sup> For example, participating in this research  
4 may appeal more to CCSs who are physically active, than to those who are not. Therefore, patients  
5 will also be made aware that a judgement will not be made on their current activity levels and that  
6 we are interested in their views regardless of whether they consider themselves to be active or not.  
7

8  
9 Although several determinants of PA may be common across CCSs as a group (e.g. fatigue), survivors  
10 will experience barriers and limitations specific to the cancer they had, and the treatment they  
11 received.<sup>50</sup> Many CCSs have ongoing health conditions and impairments to the neurological,  
12 endocrine, musculoskeletal and cardiopulmonary systems which can influence physical  
13 performance, function and mobility in a variety of ways.<sup>51</sup> Therefore, it is essential that PA  
14 interventions should not only be targeted to the needs of CCSs as a group, but allow tailoring to the  
15 needs of individuals.<sup>13</sup> To enable this, recruitment will occur via follow-up clinics for survivors of  
16 haematological malignancies, solid tumour and central nervous system tumours, and sampling will  
17 ensure variation across key characteristics including diagnosis and treatment to ensure  
18 heterogeneity in the potential influences on the PA of CCSs.  
19

20  
21 CCSs can be challenging to recruit to research,<sup>52</sup> therefore, we propose several routes by which CCSs  
22 may be made aware of the study. This will help to safeguard against any potential recruitment issues  
23 and will also ensure that a wide range of individuals are offered the opportunity to participate. We  
24 also acknowledge the potential impact of the current COVID-19 pandemic on the study, including  
25 the possible need to conduct co-design activities remotely. The use of video-conferencing could  
26 exclude those who have limited access to the required technology, or those who do not feel  
27 comfortable using it.<sup>53</sup> The use of remote methods may also hinder the interactive, creative and  
28 collaborative process essential to co-design. Therefore, we have proposed several ways that  
29 individuals can take part in co-design activities, including online synchronous and asynchronous  
30 methods. Careful and considered planning will be needed to adapt co-design activities to ensure  
31 participation and engagement, as well as an online environment in which individuals feel safe and  
32 able to contribute.  
33

34  
35 The final output from this phase of the BEACON study will be a prototype evidence-based and  
36 theoretically-informed intervention. The next step will be to fully operationalise the intervention and  
37 any supporting materials (e.g. training manual). Efficient and systematic user pre-testing studies will  
38 be conducted to provide insight into different aspects of the intervention and iteratively refine and  
39 optimise it.<sup>37</sup> Subsequently, as recommended in the area of PA research,<sup>54</sup> we plan to assess  
40 feasibility and acceptability to users and, following that, evaluate effectiveness and cost-  
41 effectiveness in a randomised controlled trial, with a parallel process evaluation.<sup>55</sup>  
42  
43

44  
45 Various organisations, including the American Cancer Society<sup>56</sup> and Macmillan Cancer Support,<sup>57</sup>  
46 have produced PA recommendations for cancer survivors (of all ages). However, understanding  
47 remains limited on how best to support survivors to improve levels of PA and maintain changes.<sup>58 59</sup>  
48 The study described here – although it focuses on CCSs – provides an example of how to use a  
49 behavioural science approach to develop a person-centred, evidence-based and theoretically-  
50 informed PA intervention and, therefore, may be informative for those interested in systematically  
51 developing PA interventions for other survivor groups.  
52  
53

#### 54 **Author contributions**

55  
56 MB, LS, RS and VAS conceived the study. MB, LS, RS, VAS, NS and AG developed the grant proposal  
57 and secured funding. MB managed the ethical and research approvals and will undertake the field  
58 work and data analysis supported primarily by LS and VAS. RS, AG and NS will support recruitment of  
59 participants. JH & OB have, and will continue to, provide PPI input. JS and KM will provide specialist  
60

1  
2  
3 advice and expertise throughout the study. MB drafted the manuscript, and AG, JS, LS, RS, KM, NS,  
4 VAS provided revisions and comments. All authors approved the final manuscript.  
5

6 **Funding statement:** This work is supported by Children's Cancer and Leukaemia Group grant  
7 number CCLGA 2017 26, North of England Children's Cancer Research, and the Children's Cancer  
8 Fund.  
9

10  
11  
12 **Competing interests statement:** No interests to declare.  
13  
14  
15

16 **Figure 1:** Overview of planned research for the BEACON project  
17

18 **Table 1:** Domains, actions and planned methods to develop physical activity intervention for  
19 childhood cancer survivors  
20

21 **Table 2:** Childhood cancer survivors' inclusion and exclusion criteria  
22  
23  
24  
25  
26  
27  
28  
29  
30  
31  
32  
33  
34  
35  
36  
37  
38  
39  
40  
41  
42  
43  
44  
45  
46  
47  
48  
49  
50  
51  
52  
53  
54  
55  
56  
57  
58  
59  
60

## REFERENCES

1. Children's Cancer and Leukaemia Group. Contact 2016 [updated September. Available from: <https://www.cclg.org.uk/Resource-Collection?id=6705c96b-61c6-421d-9219-769cf9606b28>.
2. Haupt R, Essiaf S, Dellacasa C, et al. The 'Survivorship Passport' for childhood cancer survivors. *Eur J Cancer* 2018;102:69-81. doi: <https://doi.org/10.1016/j.ejca.2018.07.006>
3. Oeffinger KC, Mertens AC, Sklar CA, et al. Chronic Health Conditions in Adult Survivors of Childhood Cancer. *N Engl J Med* 2006;355(15):1572-82. doi: 10.1056/NEJMsa060185
4. Lipshultz SE, Adams MJ, Colan SD, et al. Long-term cardiovascular toxicity in children, adolescents, and young adults who receive cancer therapy: pathophysiology, course, monitoring, management, prevention, and research directions: a scientific statement from the American Heart Association. *Circulation* 2013;128(17):1927-95. doi: 10.1161/CIR.0b013e3182a88099
5. Fidler MM, Reulen RC, Henson K, et al. Population-Based Long-Term Cardiac-Specific Mortality Among 34 489 Five-Year Survivors of Childhood Cancer in Great Britain. *Circulation* 2017;135(10):951-63. doi: 10.1161/CIRCULATIONAHA.116.024811
6. World Heart Foundation. Risk factors 2020 [Available from: <https://www.world-heart-federation.org/resources/risk-factors/> accessed 06/03/2020.
7. Slater ME, Steinberger J, Ross JA, et al. Physical Activity, Fitness, and Cardiometabolic Risk Factors in Adult Survivors of Childhood Cancer with a History of Hematopoietic Cell Transplantation. *Biol Blood Marrow Transplant* 2015;21(7):1278-83. doi: 10.1016/j.bbmt.2015.04.007
8. Zhang FF, Saltzman E, Must A, et al. Do Childhood Cancer Survivors Meet the Diet and Physical Activity Guidelines? A Review of Guidelines and Literature. *Int J Child Health Nutr* 2012;1(1):44-58. doi: 10.6000/1929-4247.2012.01.01.06 [published Online First: 2012/01/01]
9. Jones LW, Liu Q, Armstrong GT, et al. Exercise and risk of major cardiovascular events in adult survivors of childhood hodgkin lymphoma: a report from the childhood cancer survivor study. *J Clin Oncol* 2014;32(32):3643-50. doi: 10.1200/JCO.2014.56.7511
10. Braam KI, van der Torre P, Takken T, et al. Physical exercise training interventions for children and young adults during and after treatment for childhood cancer. *Cochrane Database Syst Rev* 2016(3) doi: 10.1002/14651858.CD008796.pub3
11. Pugh G, Gravestock HL, Hough RE, et al. Health Behavior Change Interventions for Teenage and Young Adult Cancer Survivors: A Systematic Review. *J Adolesc Young Adult Oncol* 2016;5(2):91-105. doi: 10.1089/jayao.2015.0042
12. Kopp LM, Gastelum Z, Guerrero CH, et al. Lifestyle behavior interventions delivered using technology in childhood, adolescent, and young adult cancer survivors: A systematic review. *Pediatr Blood Cancer* 2017;64(1):13-17. doi: 10.1002/pbc.26166
13. Brown MC SL, Skinner R, Sneihotta FF, Araujo-Soares A. The development of health behaviour change interventions for childhood cancer survivors: the need for a behavioural science approach. *Pediatr Blood Cancer* 2020;Manuscript submitted for publication
14. Bartholomew Eldredge LK, Markham, C. M., Ruiters, R. A. C., Fernandez, M. E., Kok, G., & Parcel, G. S. . Planning health promotion programs: An intervention mapping approach 4th ed. San Francisco, CA:: Jossey-Bass. 2016.
15. Craig P, Dieppe P, Macintyre S, et al. Developing and evaluating complex interventions: the new Medical Research Council guidance. *BMJ* 2008;337 doi: 10.1136/bmj.a1655
16. O'Cathain A, Croot L, Sworn K, et al. Taxonomy of approaches to developing interventions to improve health: a systematic methods overview. *Pilot Feasibility Stud* 2019;5:41. doi: 10.1186/s40814-019-0425-6 [published Online First: 2019/03/30]
17. O'Cathain A, Croot L, Duncan E, et al. Guidance on how to develop complex interventions to improve health and healthcare. *BMJ open* 2019;9(8):e029954. doi: 10.1136/bmjopen-2019-029954 [published Online First: 2019/08/20]

18. Yardley L, Morrison L, Bradbury K, et al. The person-based approach to intervention development: application to digital health-related behavior change interventions. *J Med Internet Res* 2015;17(1):e30. doi: 10.2196/jmir.4055
19. Martins J, Marques A, Sarmiento H, et al. Adolescents' perspectives on the barriers and facilitators of physical activity: a systematic review of qualitative studies. *Health Educ Res* 2015;30(5):742-55. doi: 10.1093/her/cyv042 [published Online First: 2015/09/02]
20. Brunton G, Thomas J, Harden A, et al. Promoting physical activity amongst children outside of physical education classes: A systematic review integrating intervention studies and qualitative studies. *Health Educ J* 2005;64(4):323-38. doi: 10.1177/001789690506400404
21. Michie S, Johnston M, Abraham C, et al. Making psychological theory useful for implementing evidence based practice: a consensus approach. *Qual Saf Health Care* 2005;14 doi: 10.1136/qshc.2004.011155
22. Cane J, O'Connor D, Michie S. Validation of the theoretical domains framework for use in behaviour change and implementation research. *Implementation Science* 2012;7(1):37. doi: 10.1186/1748-5908-7-37
23. Michie S, van Stralen M, West R. The Behaviour Change Wheel: a new method for characterising and designing behaviour change interventions. *Implement Sci* 2011;6 doi: 10.1186/1748-5908-6-42
24. O'Brien N, Heaven B, Teal G, et al. Integrating Evidence From Systematic Reviews, Qualitative Research, and Expert Knowledge Using Co-Design Techniques to Develop a Web-Based Intervention for People in the Retirement Transition. *Journal of medical Internet research* 2016;18(8):e210. doi: 10.2196/jmir.5790
25. Murray E, Treweek S, Pope C, et al. Normalisation process theory: a framework for developing, evaluating and implementing complex interventions. *BMC Med* 2010;8(1):63. doi: 10.1186/1741-7015-8-63
26. Glasgow RE, Vogt TM, Boles SM. Evaluating the public health impact of health promotion interventions: the RE-AIM framework. *Am J Public Health* 1999;89(9):1322-7. doi: 10.2105/ajph.89.9.1322 [published Online First: 1999/09/04]
27. Francis JJ, Johnston M, Robertson C, et al. What is an adequate sample size? Operationalising data saturation for theory-based interview studies. *Psychol Health* 2010;25(10):1229-45. doi: 10.1080/08870440903194015 [published Online First: 2010/03/06]
28. Bamidele OO, H EM, Lagan BM, et al. "Hard to reach, but not out of reach": Barriers and facilitators to recruiting Black African and Black Caribbean men with prostate cancer and their partners into qualitative research. *Eur J Cancer Care (Engl)* 2019;28(2):e12977. doi: 10.1111/ecc.12977 [published Online First: 2018/12/15]
29. Fargas-Malet M, McSherry D, Larkin E, et al. research with children: methodological issues and innovative techniques. *Journal of Early Childhood Research* 2010;8(2):175-92. doi: 10.1177/1476718x09345412
30. Institute of Child Protection Studies. A Charter of Rights for Children and Young People [poster]. , 2016.
31. Brown MC, Pearce MS, Bailey S, et al. The long-term psychosocial impact of cancer: the views of young adult survivors of childhood cancer. *Eur J Cancer Care (Engl)* 2016;25(3):428-39. doi: 10.1111/ecc.12380
32. Nuffield Council on Bioethics. Children and clinical research: ethical issues, 2015.
33. Michie S, Ashford S, Sniehotta FF, et al. A refined taxonomy of behaviour change techniques to help people change their physical activity and healthy eating behaviours: the CALO-RE taxonomy. *Psychol Health* 2011;26(11):1479-98. doi: 10.1080/08870446.2010.540664
34. Han J, Torok M, Gale N, et al. Use of Web Conferencing Technology for Conducting Online Focus Groups Among Young People With Lived Experience of Suicidal Thoughts: Mixed Methods Research. *JMIR Ment Health* 2019;6(10):e14191. doi: 10.2196/14191 [published Online First: 2019/10/08]

- 1
  - 2
  - 3
  - 4
  - 5
  - 6
  - 7
  - 8
  - 9
  - 10
  - 11
  - 12
  - 13
  - 14
  - 15
  - 16
  - 17
  - 18
  - 19
  - 20
  - 21
  - 22
  - 23
  - 24
  - 25
  - 26
  - 27
  - 28
  - 29
  - 30
  - 31
  - 32
  - 33
  - 34
  - 35
  - 36
  - 37
  - 38
  - 39
  - 40
  - 41
  - 42
  - 43
  - 44
  - 45
  - 46
  - 47
  - 48
  - 49
  - 50
  - 51
  - 52
  - 53
  - 54
  - 55
  - 56
  - 57
  - 58
  - 59
  - 60
35. Leapfrog. Be Included: reflecting on the use of social media for co-designing 2020 [Available from: <http://leapfrog.tools/blog/be-included-reflecting-on-the-use-of-social-media-for-co-designing/> accessed 11/04/2020].
36. Thrul J, Belohlavek A, Hambrick DA, et al. Conducting online focus groups on Facebook to inform health behavior change interventions: Two case studies and lessons learned. *Internet Interventions* 2017;9:106-11. doi: <https://doi.org/10.1016/j.invent.2017.07.005>
37. Bradbury K, Morton K, Band R, et al. Using the Person-Based Approach to optimise a digital intervention for the management of hypertension. *PLoS One* 2018;13(5):e0196868. doi: 10.1371/journal.pone.0196868 [published Online First: 2018/05/04]
38. Kok G, Gottlieb NH, Peters GJ, et al. A taxonomy of behaviour change methods: an Intervention Mapping approach. *Health Psychol Rev* 2016;10(3):297-312. doi: 10.1080/17437199.2015.1077155 [published Online First: 2015/08/12]
39. Braun V CV. Successful qualitative research: a practical guide for beginners. London: SAGE 2013.
40. Sullivan CM, Cain D. Ethical and safety considerations when obtaining information from or about battered women for research purposes. *Journal of interpersonal violence* 2004;19(5):603-18. doi: 10.1177/0886260504263249 [published Online First: 2004/04/24]
41. Head E. The ethics and implications of paying participants in qualitative research. *International Journal of Social Research Methodology* 2009;12(4):335-44. doi: 10.1080/13645570802246724
42. INVOLVE. Policy on payment of fees and expenses for members of the public actively involved with INVOLVE 2016 [Available from: <https://www.invo.org.uk/wp-content/uploads/2016/05/INVOLVE-internal-payment-policy-2016-final-1.pdf>].
43. World Health Organization Regional Office for Europe. United Kingdom Physical Activity Factsheet 2018 [Available from: [http://www.euro.who.int/\\_data/assets/pdf\\_file/0004/382585/united-kingdom-eng.pdf?ua=1](http://www.euro.who.int/_data/assets/pdf_file/0004/382585/united-kingdom-eng.pdf?ua=1)].
44. National Health Service. Get active your way 2018 [Available from: <https://www.nhs.uk/live-well/exercise/get-active-your-way/>].
45. Sport Australia. Find your 30 2020 [Available from: <https://www.sportaus.gov.au/findyour30>].
46. Bondaronek P, Alkhalidi G, Slee A, et al. Quality of Publicly Available Physical Activity Apps: Review and Content Analysis. *JMIR Mhealth Uhealth* 2018;6(3):e53-e53. doi: 10.2196/mhealth.9069
47. Roberts AL, Potts HW, Koutoukidis DA, et al. Breast, Prostate, and Colorectal Cancer Survivors' Experiences of Using Publicly Available Physical Activity Mobile Apps: Qualitative Study. *JMIR Mhealth Uhealth* 2019;7(1):e10918-e18. doi: 10.2196/10918
48. Bradbury K, Steele M, Corbett T, et al. Developing a digital intervention for cancer survivors: an evidence-, theory- and person-based approach. *NPJ Digit Med* 2019;2:85. doi: 10.1038/s41746-019-0163-4 [published Online First: 2019/09/12]
49. Taylor RM, Solanki A, Aslam N, et al. A participatory study of teenagers and young adults views on access and participation in cancer research. *Eur J Oncol Nurs* 2016;20:156-64. doi: <https://doi.org/10.1016/j.ejon.2015.07.007>
50. Clifford BK, Mizrahi D, Sandler CX, et al. Barriers and facilitators of exercise experienced by cancer survivors: a mixed methods systematic review. *Support Care Cancer* 2018;26(3):685-700. doi: 10.1007/s00520-017-3964-5 [published Online First: 2017/12/01]
51. Wilson CL, Gawade PL, Ness KK. Impairments that influence physical function among survivors of childhood cancer. *Children (Basel)* 2015;2(1):1-36. doi: 10.3390/children2010001
52. Hendricks-Ferguson VL, Cherven BO, Burns DS, et al. Recruitment Strategies and Rates of a Multi-Site Behavioral Intervention for Adolescents and Young Adults With Cancer. *J Pediatr Health Care* 2013;27(6):434-42. doi: 10.1016/j.pedhc.2012.04.010
53. Irani E. The Use of Videoconferencing for Qualitative Interviewing: Opportunities, Challenges, and Considerations. *Clin Nurs Res* 2019;28(1):3-8. doi: 10.1177/1054773818803170



- 1  
2  
3 54. El-Kotob R, Giangregorio LM. Pilot and feasibility studies in exercise, physical activity, or  
4 rehabilitation research. *Pilot Feasibility Stud* 2018;4:137-37. doi: 10.1186/s40814-018-0326-  
5 0  
6  
7 55. Moore GF, Audrey S, Barker M, et al. Process evaluation of complex interventions: Medical  
8 Research Council guidance. *BMJ : British Medical Journal* 2015;350:h1258. doi:  
9 10.1136/bmj.h1258  
10 56. American Cancer Society. ACS Guidelines on Nutrition and Physical Activity for Cancer Prevention  
11 2020 [Available from: [https://www.cancer.org/healthy/eat-healthy-get-active/acs-](https://www.cancer.org/healthy/eat-healthy-get-active/acs-guidelines-nutrition-physical-activity-cancer-prevention.html)  
12 [guidelines-nutrition-physical-activity-cancer-prevention.html](https://www.cancer.org/healthy/eat-healthy-get-active/acs-guidelines-nutrition-physical-activity-cancer-prevention.html).  
13  
14 57. Macmillan Cancer Support. Physical Activity 2020 [Available from:  
15 [https://www.macmillan.org.uk/about-us/health-professionals/programmes-and-](https://www.macmillan.org.uk/about-us/health-professionals/programmes-and-services/physical-activity)  
16 [services/physical-activity](https://www.macmillan.org.uk/about-us/health-professionals/programmes-and-services/physical-activity).  
17  
18 58. Grimmett C, Corbett T, Brunet J, et al. Systematic review and meta-analysis of maintenance of  
19 physical activity behaviour change in cancer survivors. *Int J Behav Nutr Phys Act*  
20 2019;16(1):37-37. doi: 10.1186/s12966-019-0787-4  
21  
22 59. Turner RR, Steed L, Quirk H, et al. Interventions for promoting habitual exercise in people living  
23 with and beyond cancer. *Cochrane Database Syst Rev* 2018(9) doi:  
24 10.1002/14651858.CD010192.pub3  
25  
26  
27  
28  
29  
30  
31  
32  
33  
34  
35  
36  
37  
38  
39  
40  
41  
42  
43  
44  
45  
46  
47  
48  
49  
50  
51  
52  
53  
54  
55  
56  
57  
58  
59  
60



**Table 1: Domains, actions and planned methods to develop physical activity intervention for childhood cancer survivors**

| Key actions to consider for intervention development <sup>16</sup>                                                                                                                                | Domain of intervention development and associated specific action(s) <sup>15</sup>                                                                                                                                                                                                                                                                                                                            | Methods utilised, or planned in this research to develop intervention                                                                                                                                                                                                                                                                                                                                                                                                                                                                                                           |
|---------------------------------------------------------------------------------------------------------------------------------------------------------------------------------------------------|---------------------------------------------------------------------------------------------------------------------------------------------------------------------------------------------------------------------------------------------------------------------------------------------------------------------------------------------------------------------------------------------------------------|---------------------------------------------------------------------------------------------------------------------------------------------------------------------------------------------------------------------------------------------------------------------------------------------------------------------------------------------------------------------------------------------------------------------------------------------------------------------------------------------------------------------------------------------------------------------------------|
| Planning the process<br>Involving stakeholders<br>Bringing together a team                                                                                                                        | <b>Conception</b>                                                                                                                                                                                                                                                                                                                                                                                             |                                                                                                                                                                                                                                                                                                                                                                                                                                                                                                                                                                                 |
|                                                                                                                                                                                                   | 1. Identifying the problem in need of a new intervention (including the health problem, the problematic behaviour and the target population)                                                                                                                                                                                                                                                                  | <ul style="list-style-type: none"> <li>• Identification and evaluation of the literature on:               <ul style="list-style-type: none"> <li>- Prevalence of cardiovascular late effects in CCSs</li> <li>- Low PA in CCSs</li> <li>- Benefit of PA to the health of CCSs</li> </ul> </li> <li>• Clinical experience/knowledge of low PA in CCSs.</li> </ul>                                                                                                                                                                                                               |
| Reviewing published evidence<br>Undertaking primary data collection<br>Drawing on existing theories<br>Articulate programme theory<br>Understanding context<br>Attending to future implementation | <b>Planning</b>                                                                                                                                                                                                                                                                                                                                                                                               |                                                                                                                                                                                                                                                                                                                                                                                                                                                                                                                                                                                 |
|                                                                                                                                                                                                   | 2. Setting up a planning group/development team                                                                                                                                                                                                                                                                                                                                                               | <ul style="list-style-type: none"> <li>• Establishing a multidisciplinary steering group involving:               <ul style="list-style-type: none"> <li>- Researchers and academics with expertise in health psychology, behavioural science/intervention development, exercise physiology, PA interventions in clinical populations, digital health innovation.</li> <li>- HCPs and service providers (consultant oncologists, nurse specialists).</li> <li>- Patient representatives.</li> </ul> </li> </ul>                                                                 |
|                                                                                                                                                                                                   | 3. Understanding the problem to be addressed<br><br><i>i. Understanding the views and experiences and psycho-social of the potential target population</i>                                                                                                                                                                                                                                                    | <ul style="list-style-type: none"> <li>• Use of patient and public involvement during initial stages of planning:               <ul style="list-style-type: none"> <li>- Gaining young peoples' views of PA and the study concept via an NHS young persons' advisory group</li> <li>- Consultation with CCSs on the need for PA interventions via focus group and survey methods</li> </ul> </li> <li>• Identification of literature reporting HCPs (who may be involved in the resulting intervention) views of PA in CCSs, and the provision of PA advice to CCSs.</li> </ul> |
|                                                                                                                                                                                                   | <i>ii. Assessing the causes of the problems</i>                                                                                                                                                                                                                                                                                                                                                               | <ul style="list-style-type: none"> <li>• Undertaking research to explore and understand CCSs views and experiences of PA               <ul style="list-style-type: none"> <li>- Literature review of the barriers and facilitators to PA in CCSs</li> <li>- Undertaking in-depth interviews with CCSs and their parents regarding their views and experiences of PA, including perceived barriers and facilitators (informed by the Theoretical Domains Framework)</li> <li>- Creating a logic model of the problem</li> </ul> </li> </ul>                                      |
| <i>iii. Describing and understanding the wider context of the target population and the context in which the intervention will be implemented</i>                                                 | <ul style="list-style-type: none"> <li>• Undertaking research to explore the views of CCSs views of receiving lifestyle/PA advice in follow-up care.               <ul style="list-style-type: none"> <li>- Survey and interviews with CCSs attending follow-up care</li> </ul> </li> <li>• Involving HCPs, service providers and patients in steering group and in co-production of intervention.</li> </ul> |                                                                                                                                                                                                                                                                                                                                                                                                                                                                                                                                                                                 |
| <i>iv. Identifying the effectiveness of interventions for PA in CCSs</i>                                                                                                                          | <ul style="list-style-type: none"> <li>• Identification and evaluation of existing PA interventions in CCSs.               <ul style="list-style-type: none"> <li>- Systematic reviews of PA interventions in CCSs</li> <li>- Research evaluating PA interventions in CCSs</li> </ul> </li> </ul>                                                                                                             |                                                                                                                                                                                                                                                                                                                                                                                                                                                                                                                                                                                 |

|                                                                                                                              |                                                                                                                                  |                                                                                                                                                                                                                                                                                                                                                                  |
|------------------------------------------------------------------------------------------------------------------------------|----------------------------------------------------------------------------------------------------------------------------------|------------------------------------------------------------------------------------------------------------------------------------------------------------------------------------------------------------------------------------------------------------------------------------------------------------------------------------------------------------------|
|                                                                                                                              | v. <i>Understanding wider stakeholders' perspectives of problems and issues</i>                                                  | <ul style="list-style-type: none"> <li>Actively engage with stakeholders, service providers and patients throughout research and in co-production of intervention.</li> </ul>                                                                                                                                                                                    |
| Drawing on existing theories<br>Articulating programme theory<br>Understanding context<br>Attending to future implementation | 4. <i>Making decisions about aims and goals of intervention</i>                                                                  | Based on the evidence generated in WP1, the steering group and research team will make decisions on the specific aims and goals of intervention. These will be presented and discussed in co-design workshops.                                                                                                                                                   |
|                                                                                                                              | 5. <i>Identifying what needs to change, how to bring about change</i>                                                            | Following WP1 a logical model of change will be developed for PA in CCS drawing on the evidence and constructs from relevant theories.                                                                                                                                                                                                                           |
|                                                                                                                              | 6. <i>Specify who will change, how and when</i>                                                                                  | <ul style="list-style-type: none"> <li>Following WP1 the steering group and research team will break down the behavioural outcomes to consider, prioritise and map who needs to change what, how changes will occur as a result of the intervention and when these changes are expected to take place.</li> </ul>                                                |
|                                                                                                                              | 7. <i>Considering the real-world issues about cost and delivery of any intervention to reduce risk of implementation failure</i> | <ul style="list-style-type: none"> <li>Involvement of HCPs/service providers in development team</li> <li>Co-design workshops with stakeholders (including HCPs)</li> <li>Use of Normalisation Theory Process to inform discussion with HCPs</li> </ul>                                                                                                          |
|                                                                                                                              | 8. <i>Considering whether it is worthwhile continuing with development of intervention</i>                                       | <ul style="list-style-type: none"> <li>Steering group and stakeholder input on feasibility of intervention</li> </ul>                                                                                                                                                                                                                                            |
| Designing and refining intervention                                                                                          | <b>Designing</b>                                                                                                                 |                                                                                                                                                                                                                                                                                                                                                                  |
|                                                                                                                              | 9. <i>Generating ideas about solutions and components and features of an intervention</i>                                        | <ul style="list-style-type: none"> <li>Mapping of behavioural determinants onto behaviour change techniques using Behaviour Change Wheel.</li> <li>Co-design workshops using creative methods and activities to enable idea generation</li> </ul>                                                                                                                |
|                                                                                                                              | 10. <i>Re-visit decisions about where to intervene</i>                                                                           | <ul style="list-style-type: none"> <li>Input from stakeholders to make final decisions regarding the scope, the target population, key features and components of intervention which will be further refined during workshops.</li> </ul>                                                                                                                        |
|                                                                                                                              | 11. <i>Make decisions about the content, format and delivery of the intervention</i>                                             | <ul style="list-style-type: none"> <li>Findings of WP1 will be combined into a theoretical model of PA in CCSs and to develop initial ideas about content, format and delivery.</li> <li>Actively engaging with steering group and stakeholders via co-design workshops to obtain views on the potential content, format and delivery of intervention</li> </ul> |
|                                                                                                                              | 12. <i>Design an implementation plan, thinking about who will adopt the intervention and maintain it</i>                         | <ul style="list-style-type: none"> <li>Design of potential implementation plan will be informed by discussions with HCPs and other stakeholders regarding potential implementation barriers and previous research.</li> </ul>                                                                                                                                    |
|                                                                                                                              | <b>Creating</b>                                                                                                                  |                                                                                                                                                                                                                                                                                                                                                                  |
|                                                                                                                              | 13. <i>Make prototypes/mock-ups of the intervention where relevant</i>                                                           | <ul style="list-style-type: none"> <li>Generation and discussion of mock-ups and paper-based prototypes during co-design workshop.</li> </ul>                                                                                                                                                                                                                    |

**Table 2: Childhood cancer survivors' inclusion and exclusion criteria**

| Inclusion criteria                                                                            | Exclusion criteria                                                                                                            |
|-----------------------------------------------------------------------------------------------|-------------------------------------------------------------------------------------------------------------------------------|
| Diagnosed with any haematological malignancy or solid or CNS tumour under the age of 19 years | Any cognitive or physical impairment of sufficient severity to limit their ability to understand, engage with or undertake PA |
| Currently aged 10-24 years                                                                    | Any contraindications to exercise                                                                                             |
| Currently 2-15 years from the end of treatment                                                |                                                                                                                               |
| No active disease                                                                             |                                                                                                                               |

For peer review only

1  
2  
3  
4  
5  
6  
7  
8  
9  
10  
11  
12  
13  
14  
15  
16  
17  
18  
19  
20  
21  
22  
23  
24  
25  
26  
27  
28  
29  
30  
31  
32  
33  
34  
35  
36  
37  
38  
39  
40  
41

Input from steering group and PPI

Workpackage 1

### In-depth interviews informed by theory

To identify perceived barriers and facilitators to PA in CCSs

CCSs recruited from two NHS trusts

Parents of CCSs recruited from two NHS trusts

Thematic analysis of interview data

Previous primary research with CSSs and systematic reviews of relevant literature will also inform work package 2

Workpackage 2

### Phase 1: Behavioural analysis

Identifying potentially modifiable determinants of PA in CCSs and developing a theoretical model of PA in CCSs. Identifying potential intervention functions, components and behaviour change techniques

### Phase 2: Co-design process

**Stage 1 co-design activities**  
Testing evidence statements  
Generate new ideas for interventions

**Participants:**  
CCSs, parents, HCPs, academics/researchers

**Output:**  
Intervention principles

**Stage 2 co-design activities**  
User feedback on intervention principles  
Develop core intervention ideas/concepts  
Design prototypes of potential interventions

**Participants:**  
CCSs, parents, HCPs, academics/researchers

**Output:**  
Core concepts  
Paper prototypes

Final output: Prototype intervention

Childhood cancer survivors (CCSs); Healthcare professionals (HCPs); Physical activity (PA) [out/guidelines.xhtml](#)

Figure 1: Overview of planned research for the BEACON project
